# Supplementary material
Source: PubMed Central journal article supplement (PMC4827469)

# **Antroquinonol A: Scalable Synthesis and Biology of a Phase-2 Drug Candidate**

Matthew T. Villaume,<sup>‡§</sup> Eran Sella,<sup>‡§</sup> Garrett Saul,<sup>‡</sup> Robert M. Borzilleri,<sup>†</sup> Joseph Fagnoli,<sup>†</sup> Kathy A.

Johnston,<sup>†</sup> Haiying Zhang,<sup>†</sup> Mark P. Fereshteh,<sup>†</sup> T. G. Murali Dhar<sup>\*†</sup> and Phil S. Baran<sup>\*‡</sup>

*<sup>‡</sup>Department of Chemistry, The Scripps Research Institute,*

*10550 N. Torrey Pines Rd, La Jolla, CA 92037*

*<sup>†</sup>Departments of Discovery Chemistry, Oncology Discovery and Leads Discovery & Optimization, Preclinical*

*Optimization, Bristol-Myers Squibb Co., Route 206 and Province Line Road, Princeton, New Jersey 08543,*

*United States*

## **SUPPORTING INFORMATION**

### **Part 2: Copies of NMR Spectra**

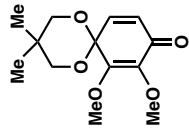

12

<sup>1</sup>H NMR (400 MHz, CDCl<sub>3</sub>)

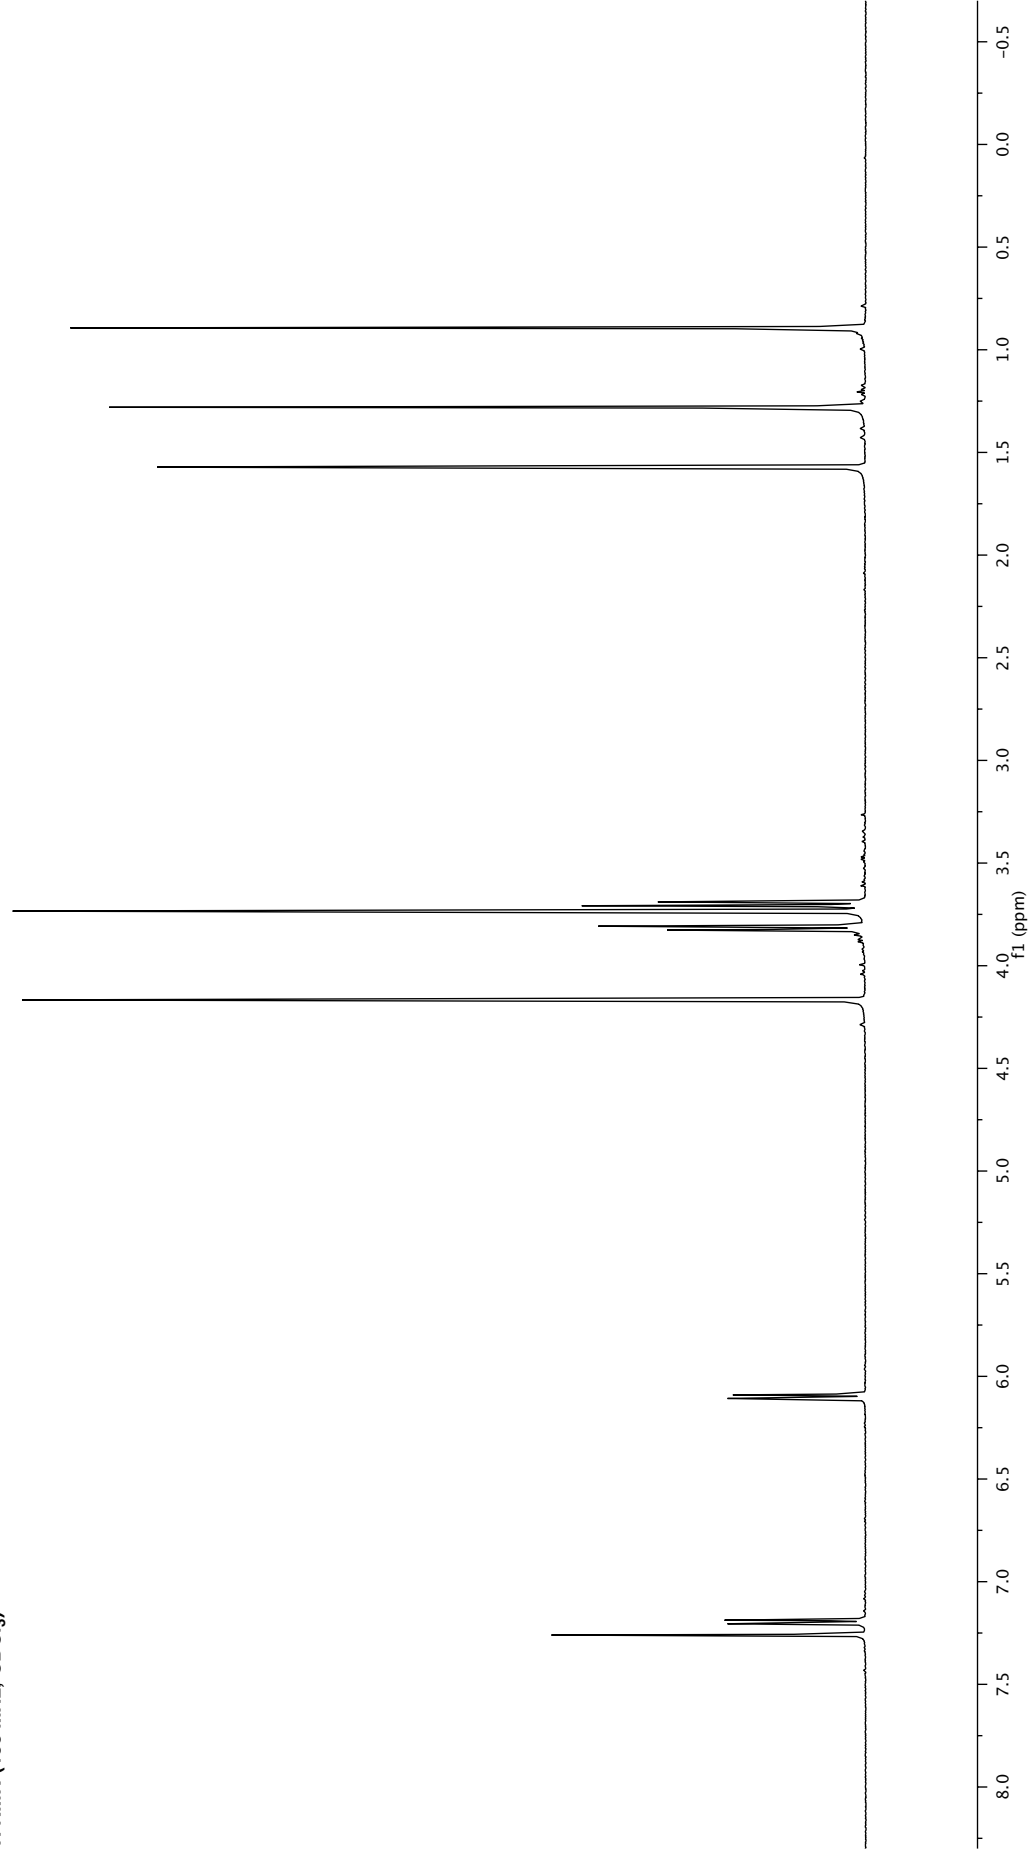

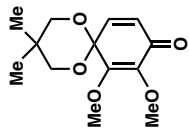

12

<sup>13</sup>C NMR (151 MHz, CDCl<sub>3</sub>)

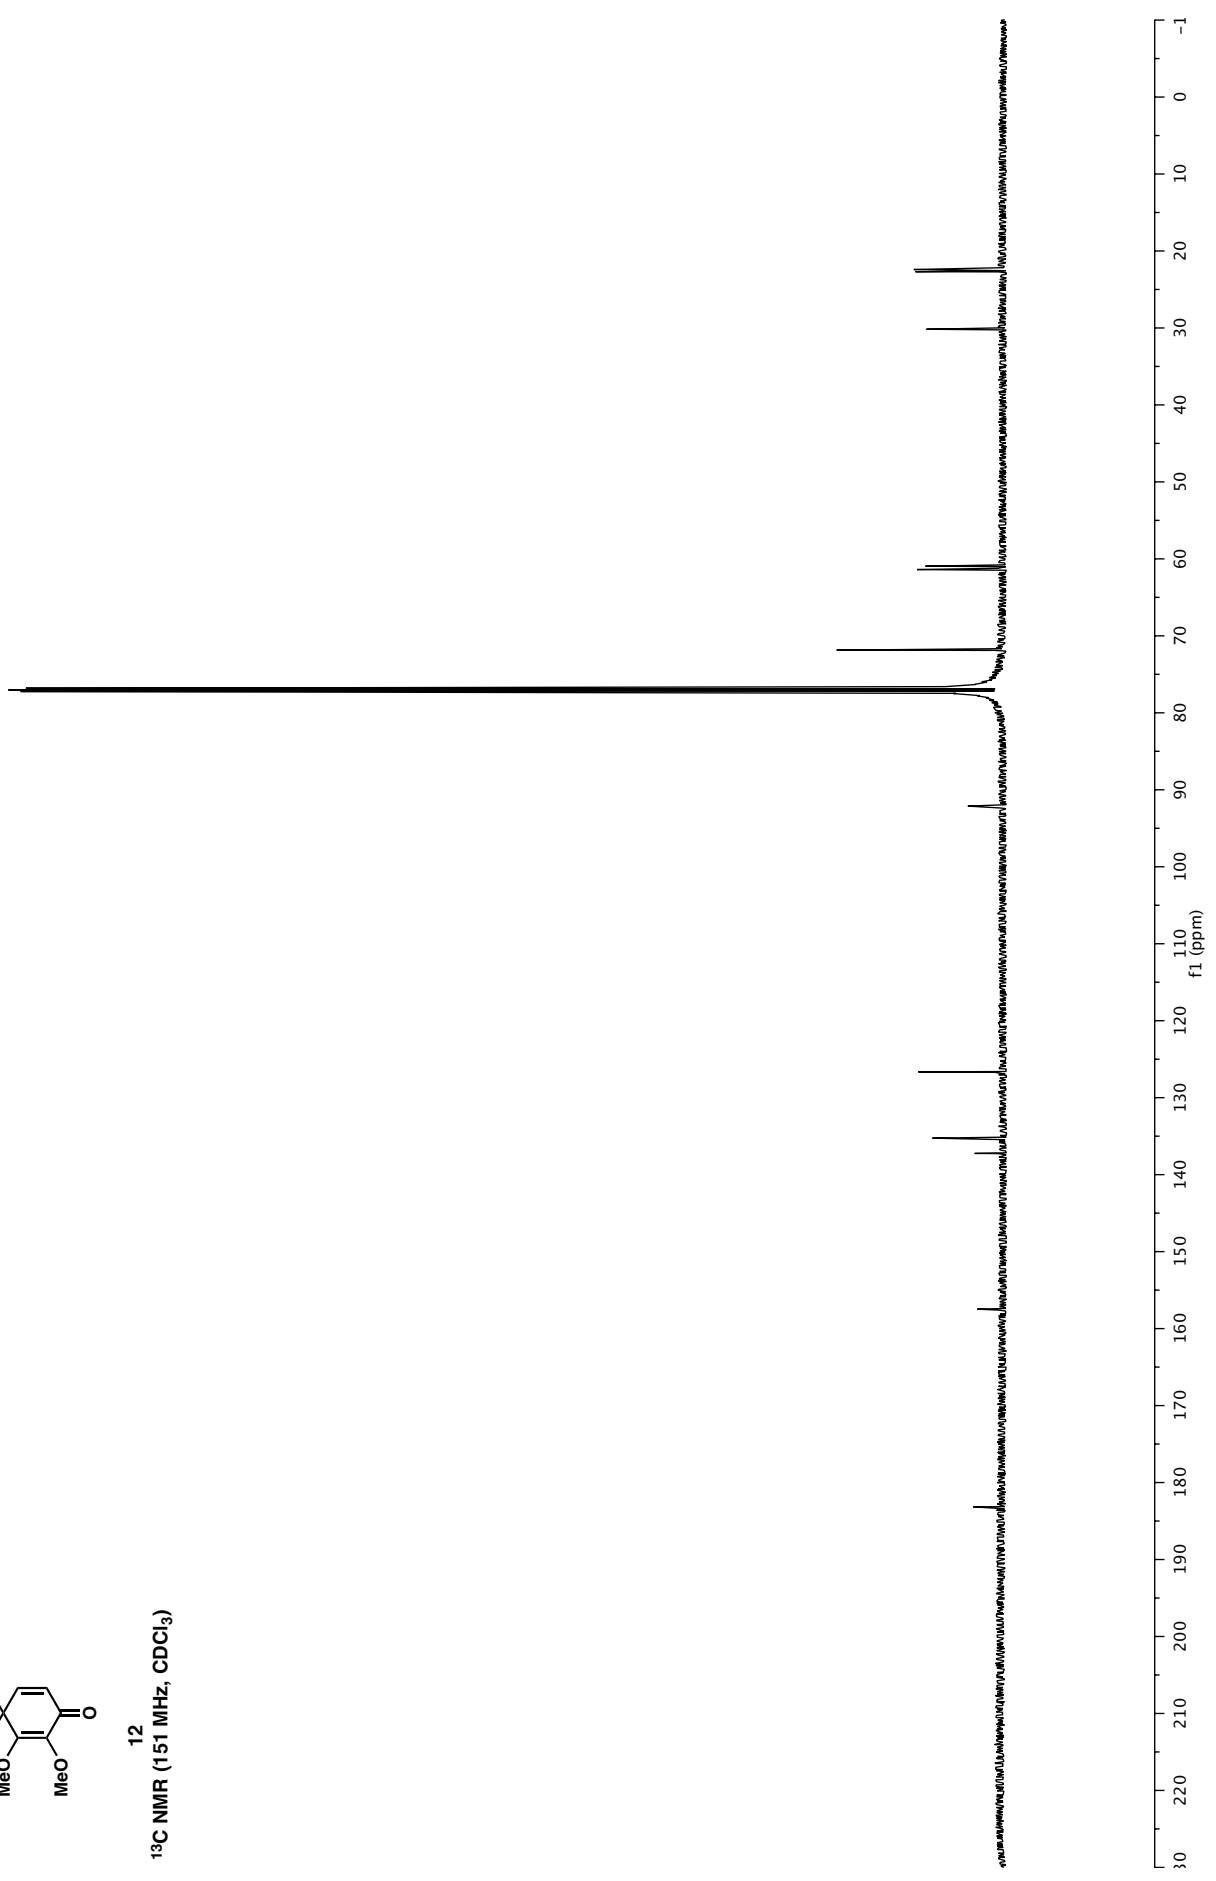

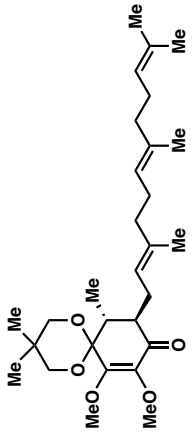

<sup>1</sup>H NMR (400 MHz, CDCl<sub>3</sub>)

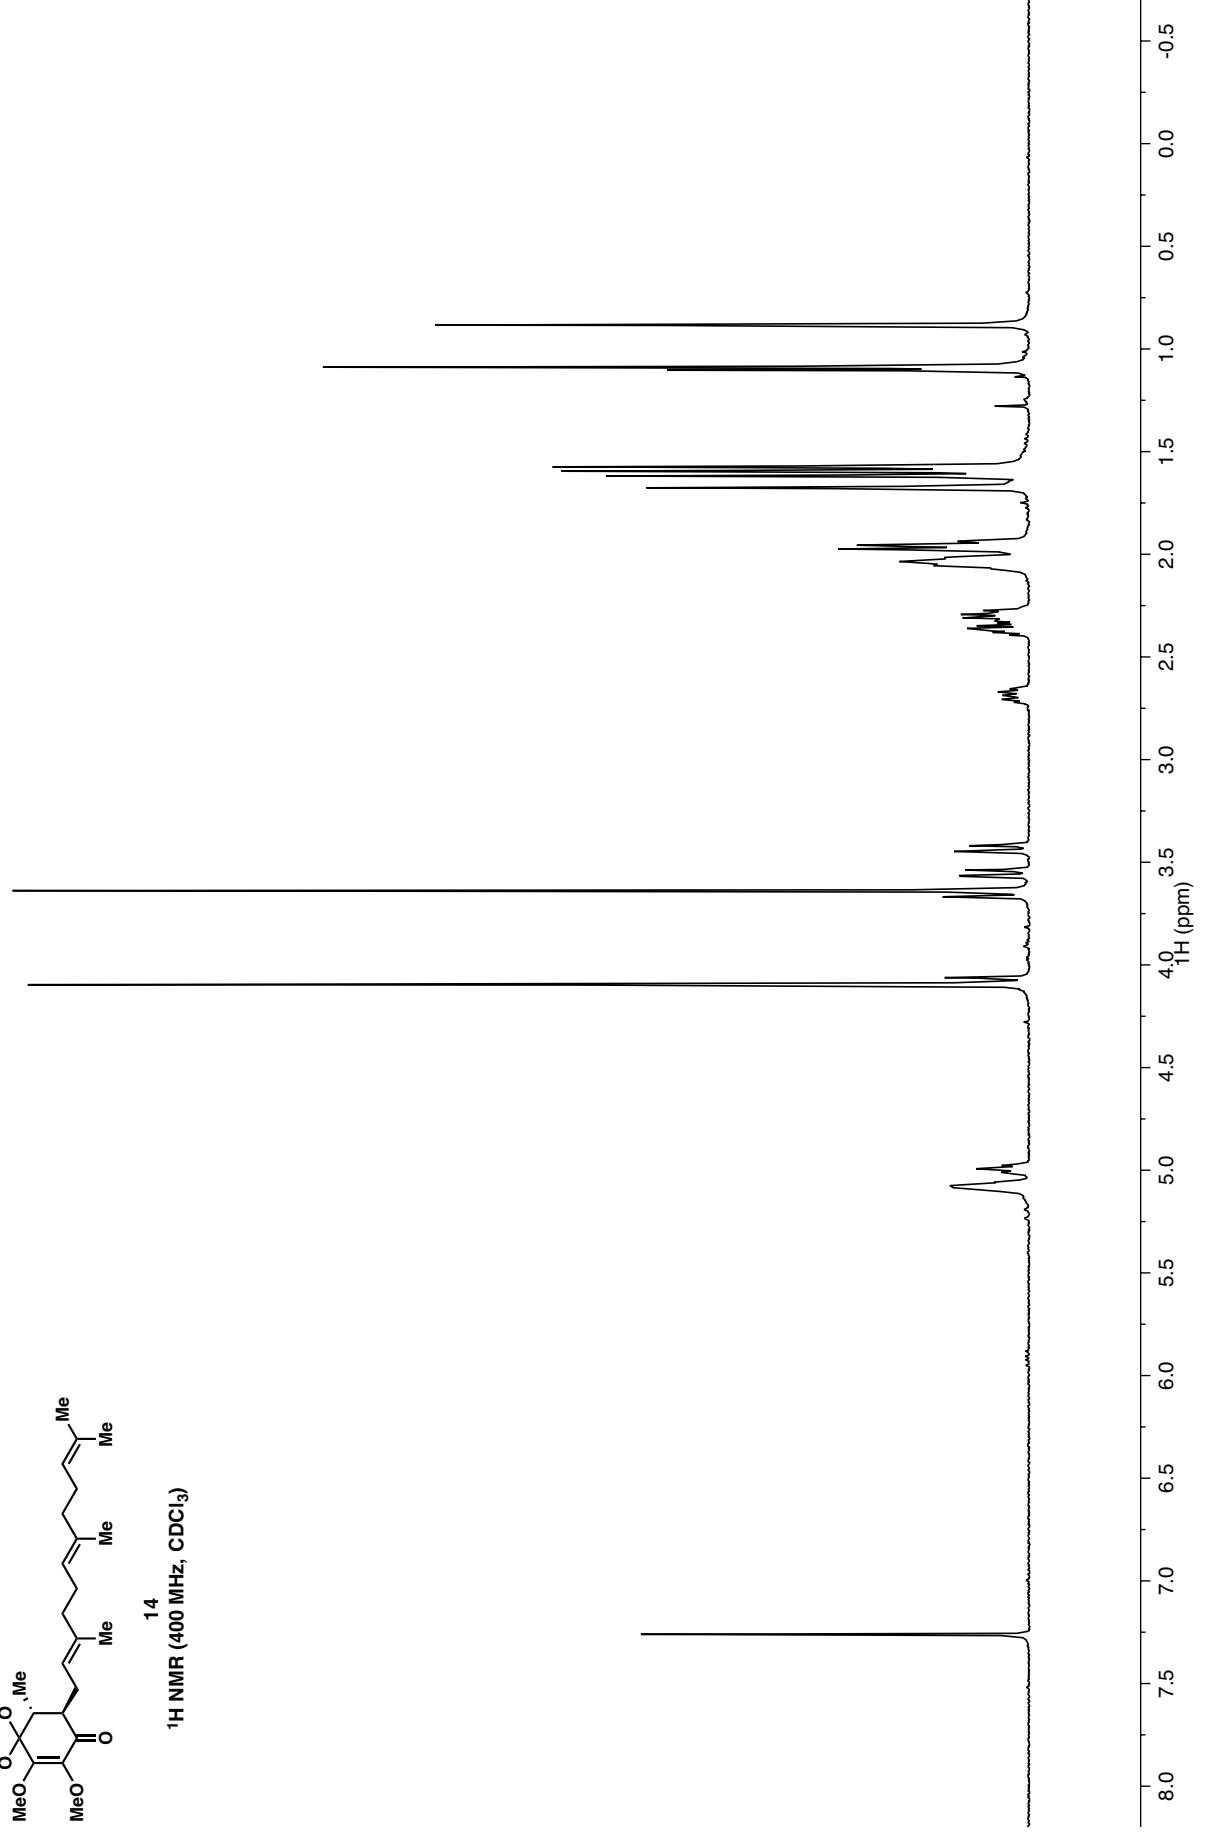

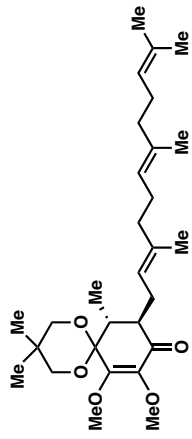

<sup>14</sup>  
<sup>13</sup>C NMR (151 MHz, CDCl<sub>3</sub>)

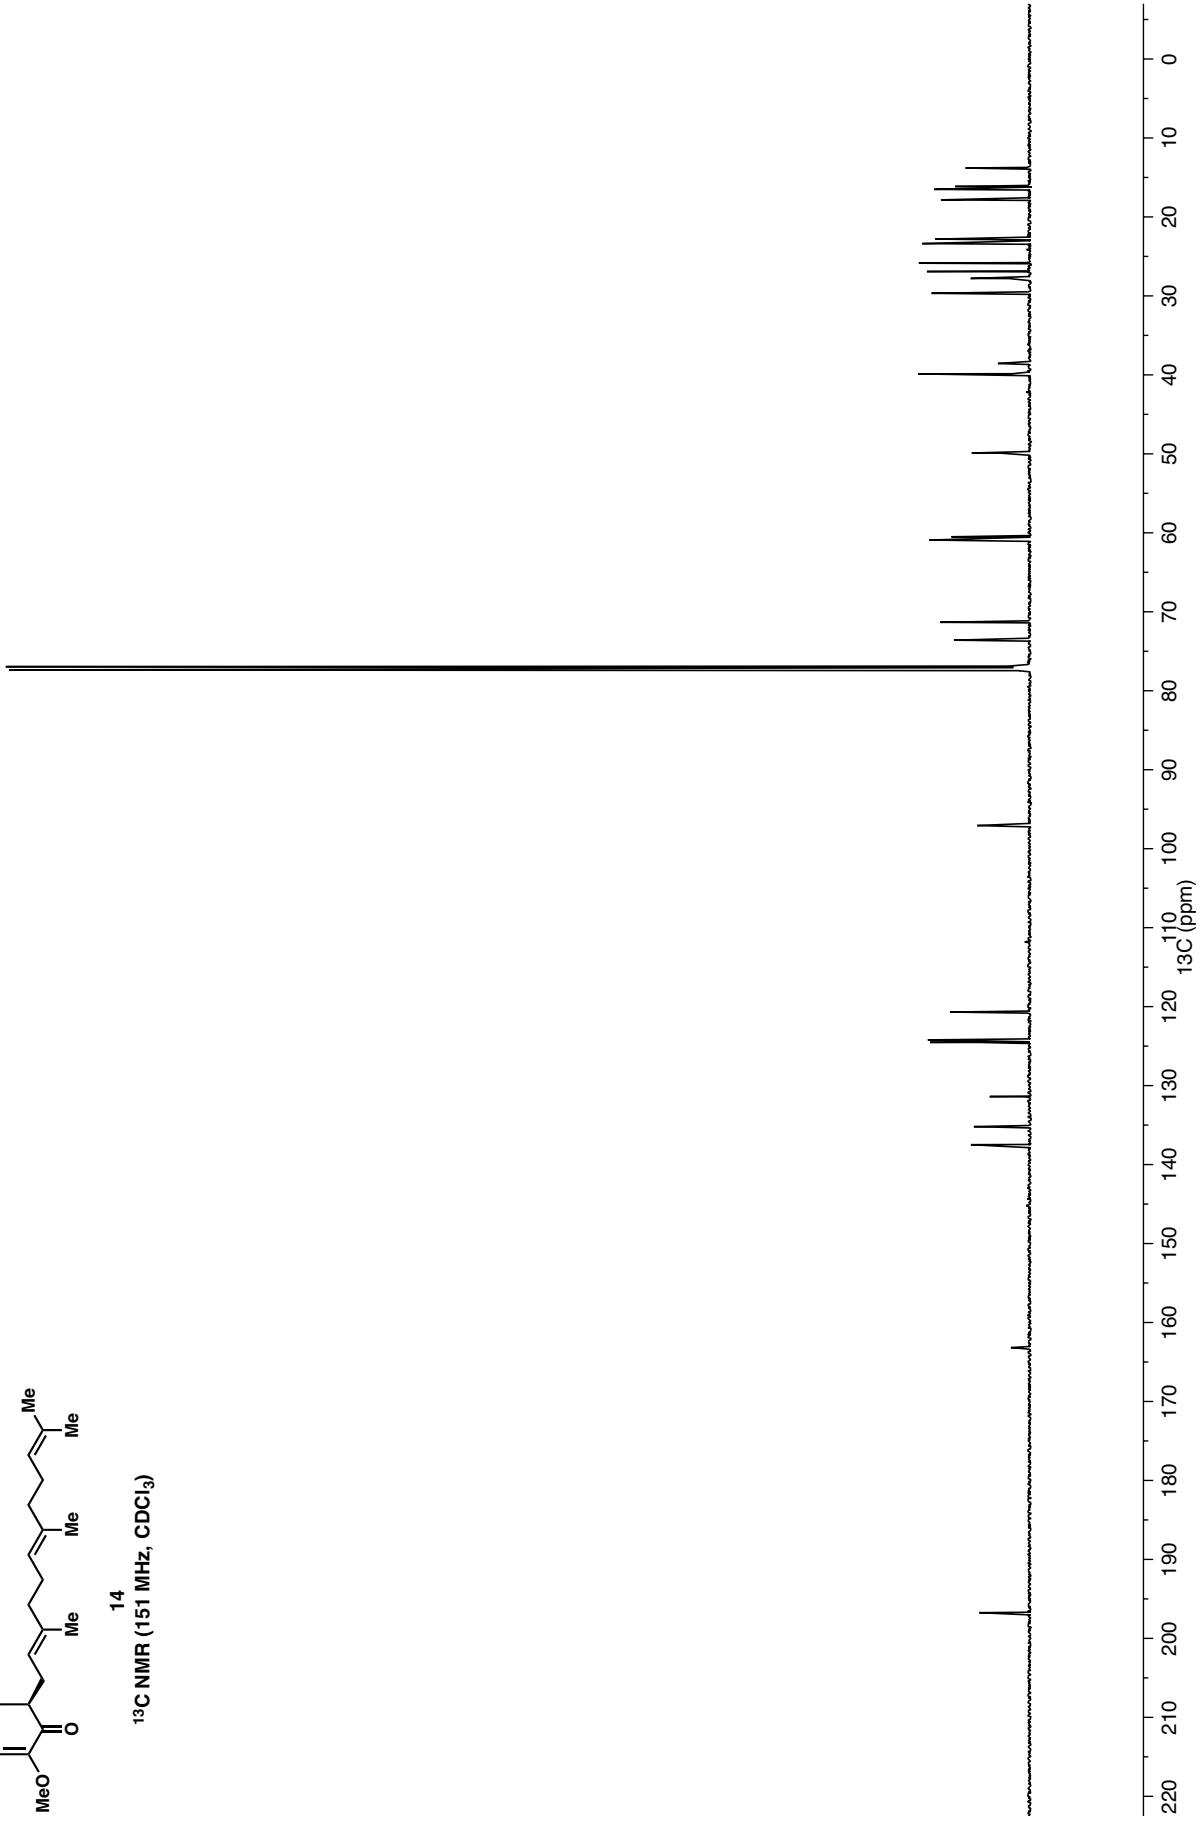

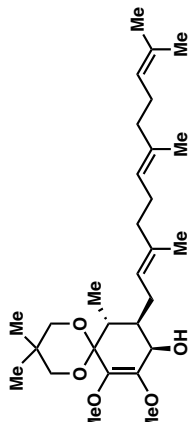

S13  
<sup>1</sup>H NMR (400 MHz, CDCl<sub>3</sub>)

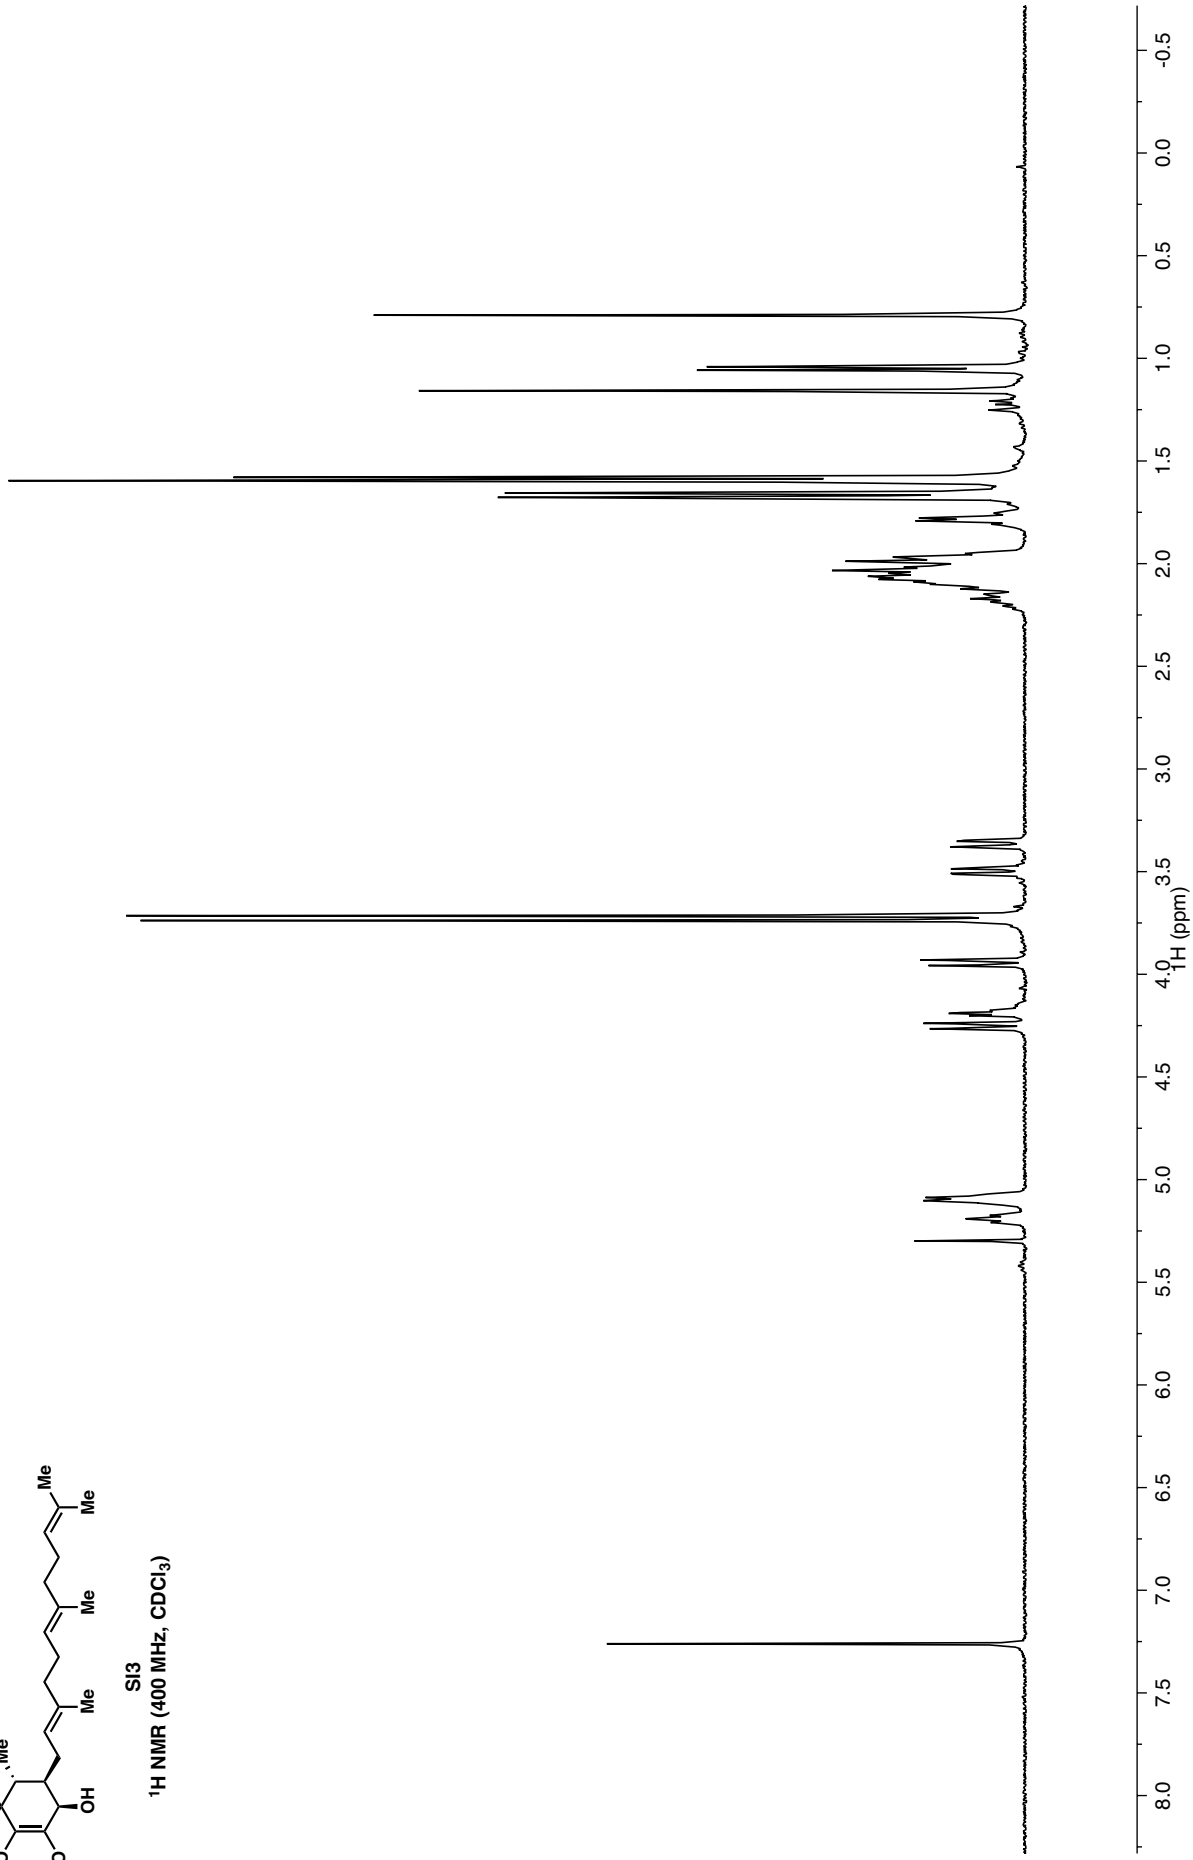

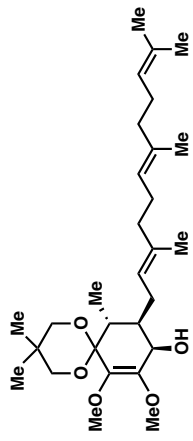

SI3

$^{13}\text{C}$  NMR (151 MHz,  $\text{CDCl}_3$ )

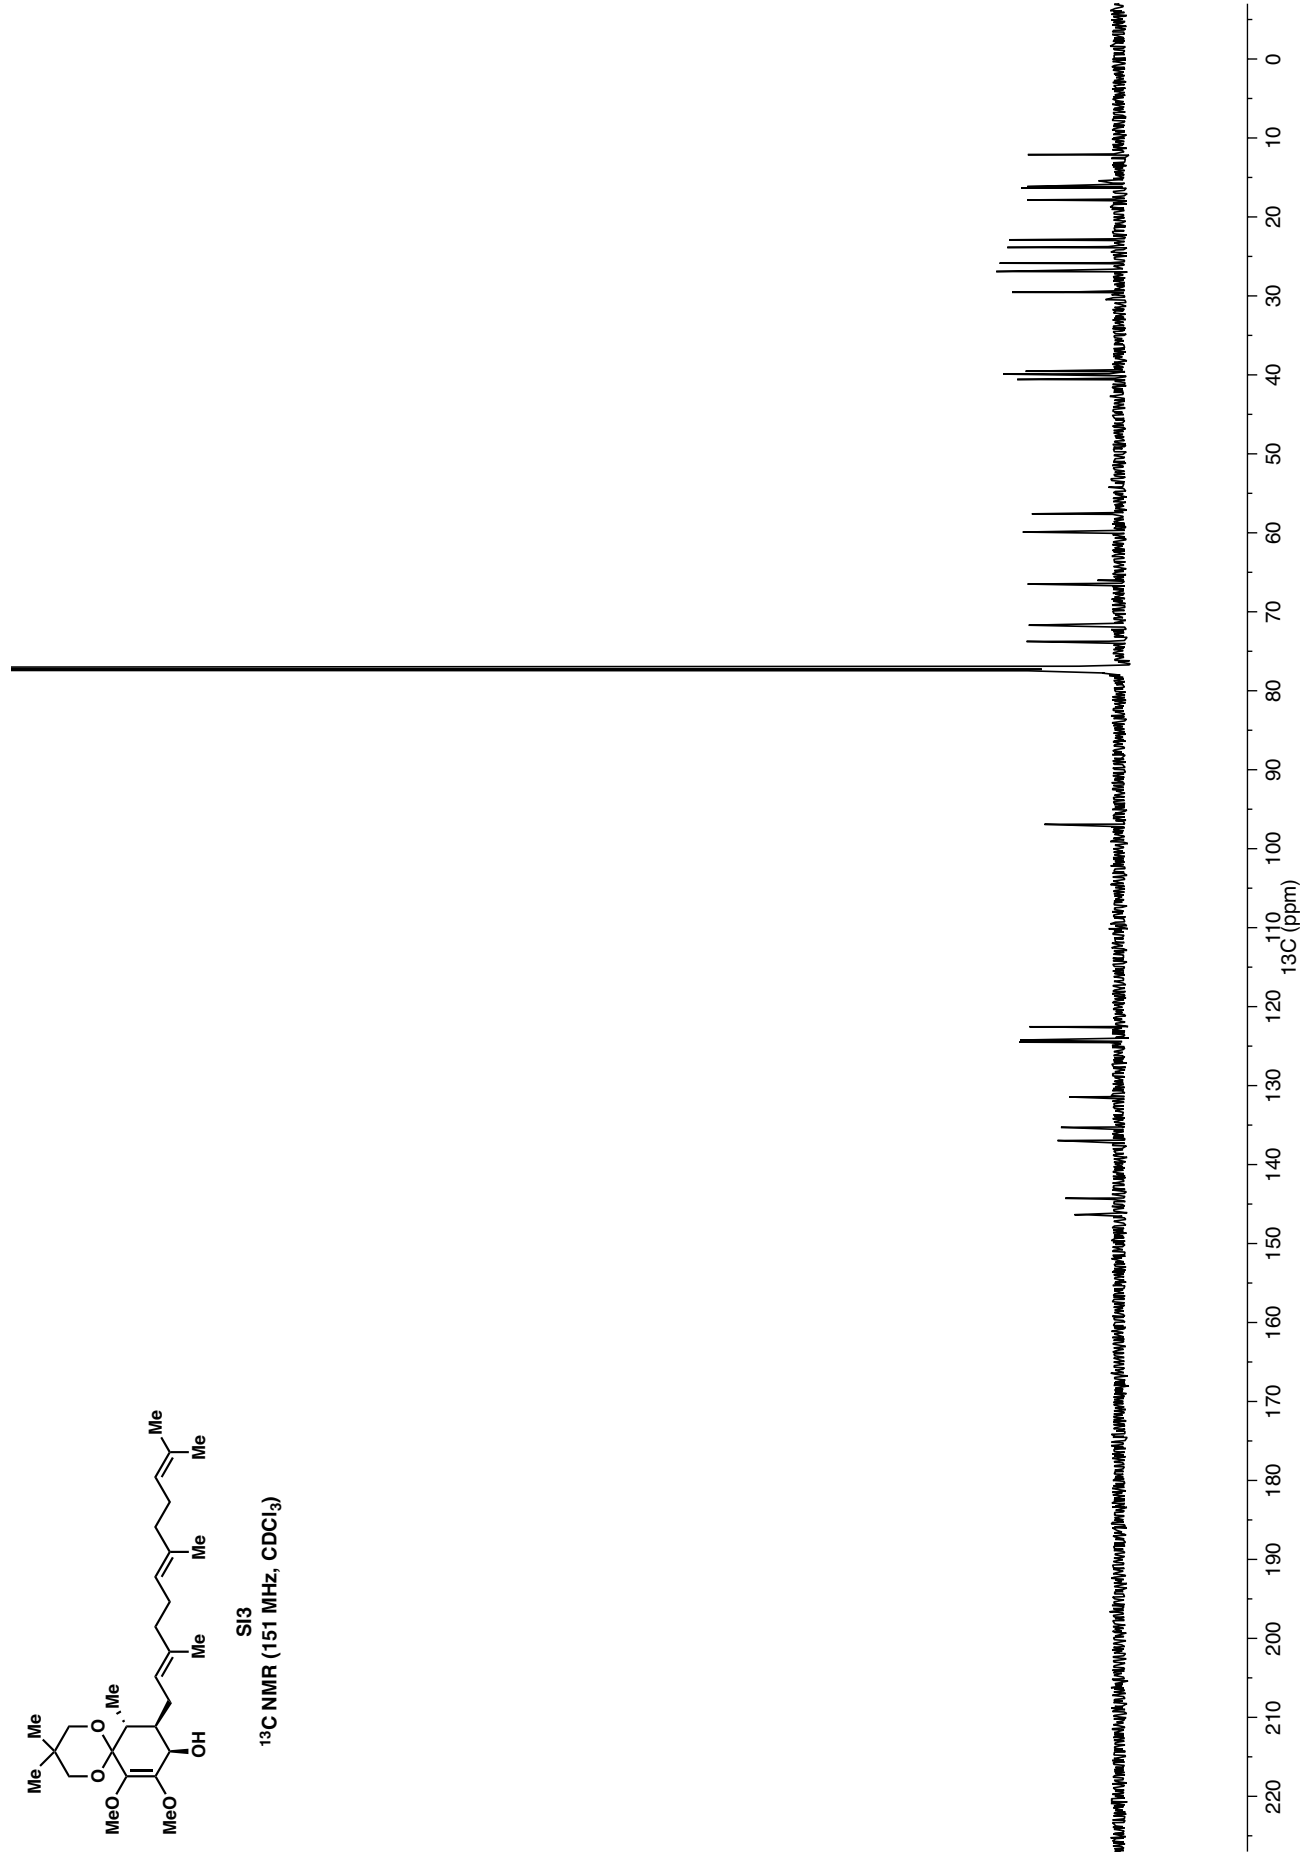

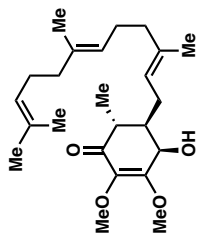

1

<sup>1</sup>H NMR (400 MHz, CDCl<sub>3</sub>)

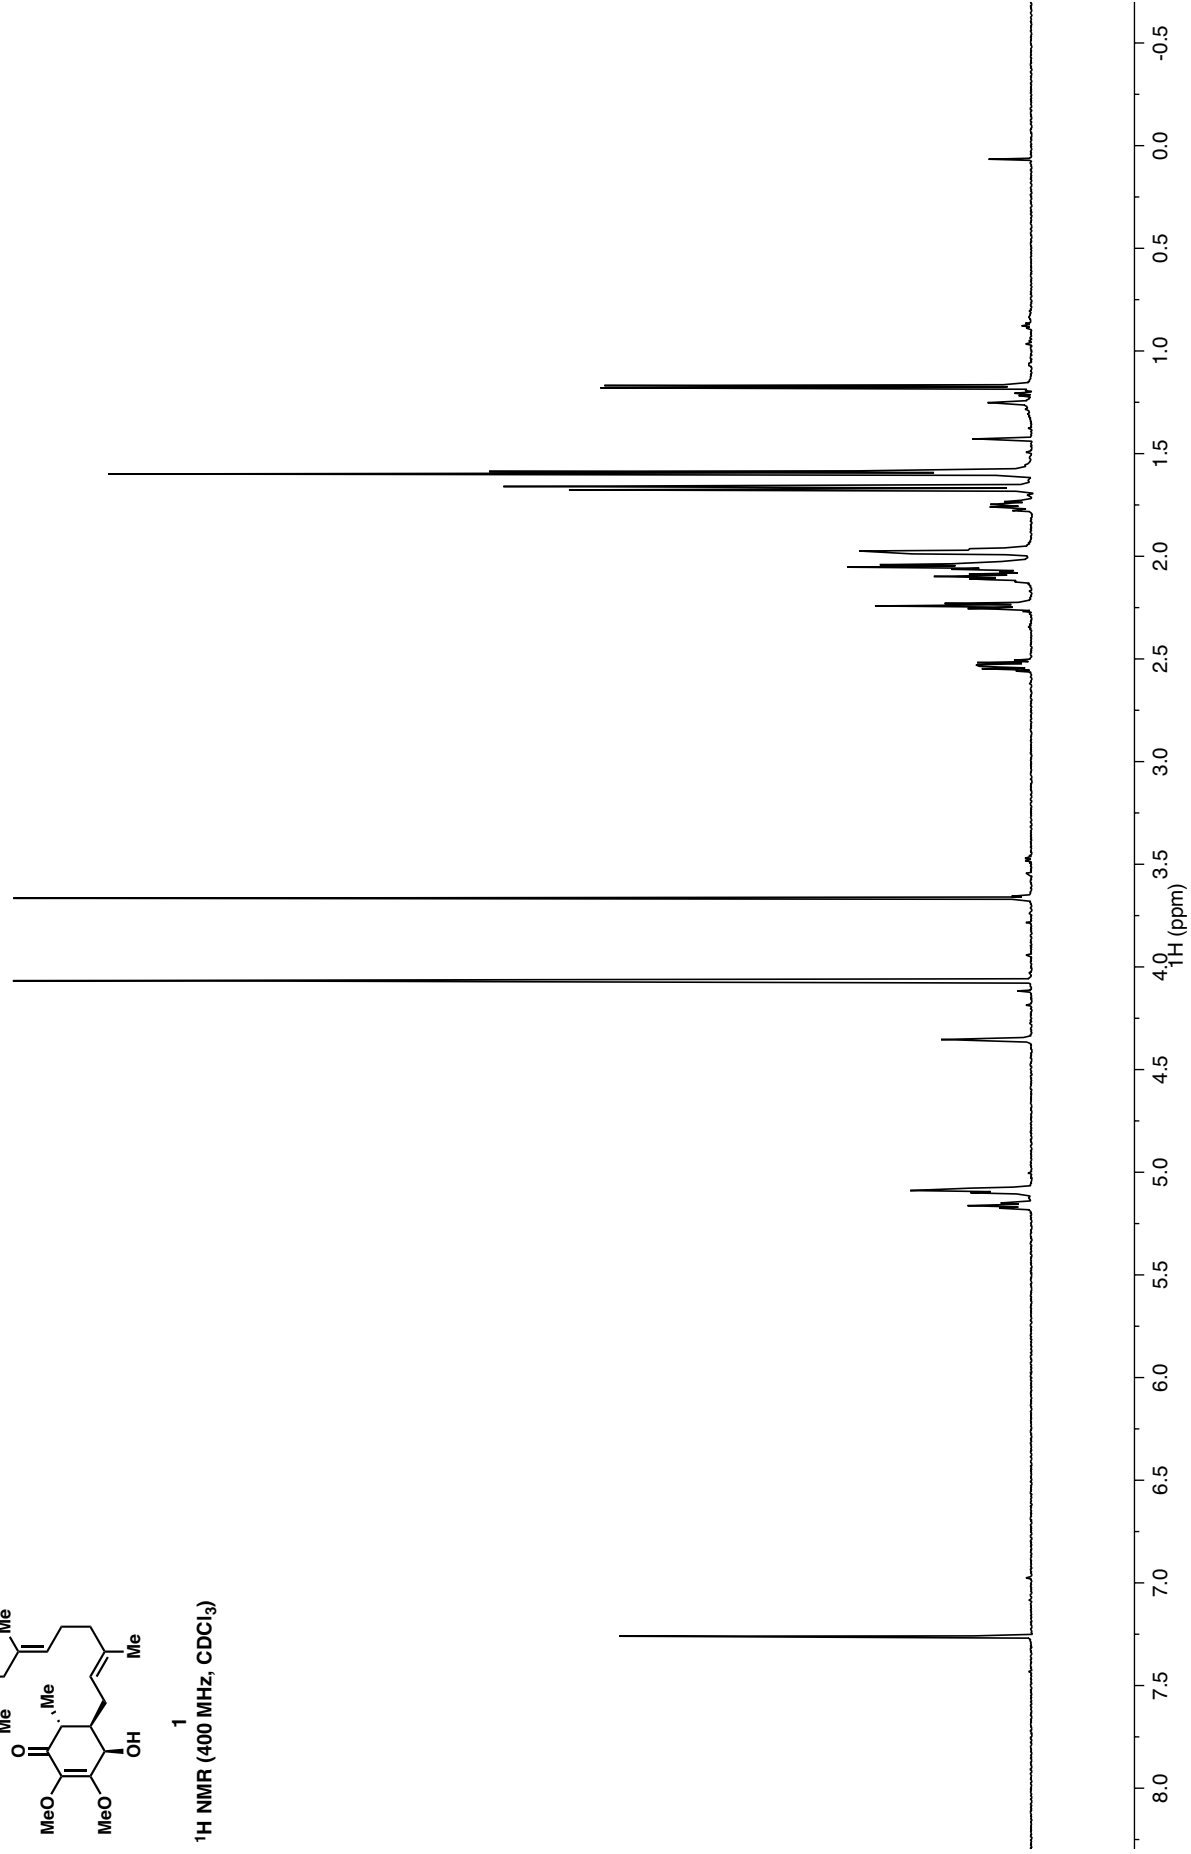



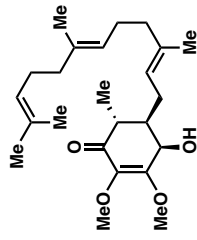

1

<sup>13</sup>C NMR (151 MHz, CDCl<sub>3</sub>)

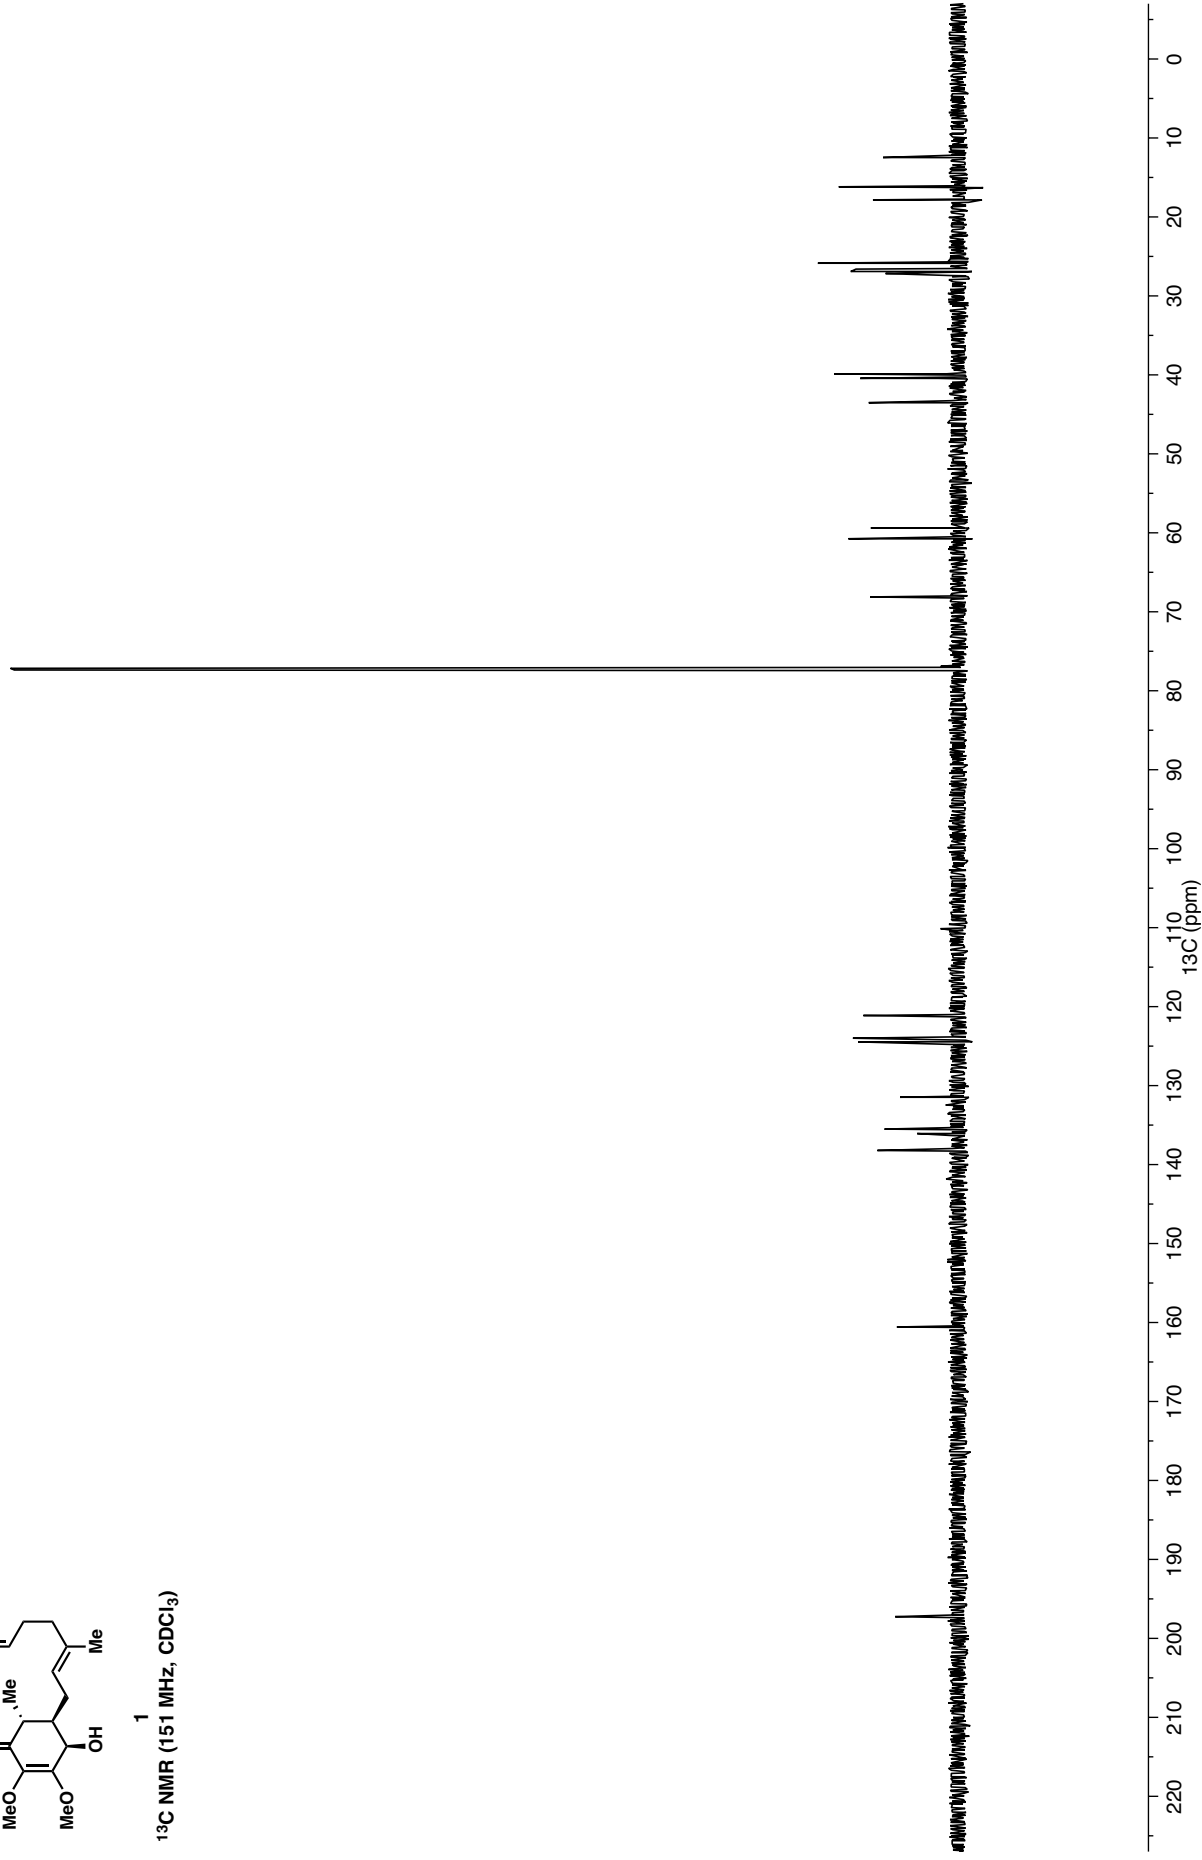

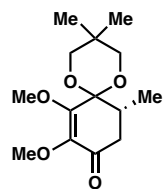

13

<sup>1</sup>H NMR (400 MHz, CDCl<sub>3</sub>)

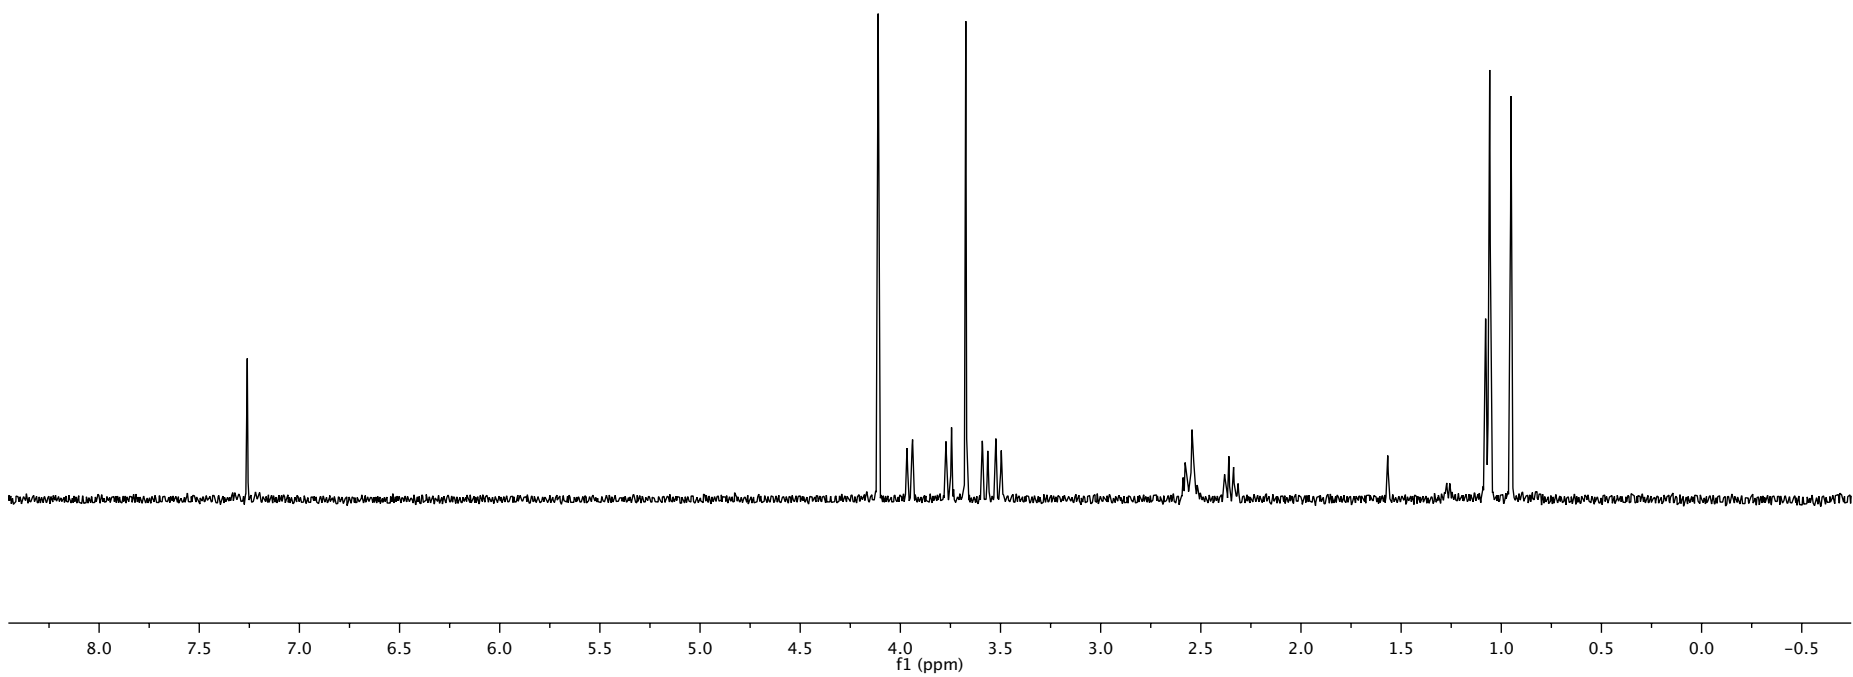

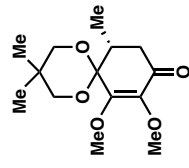

13

<sup>13</sup>C NMR (151 MHz, CDCl<sub>3</sub>)

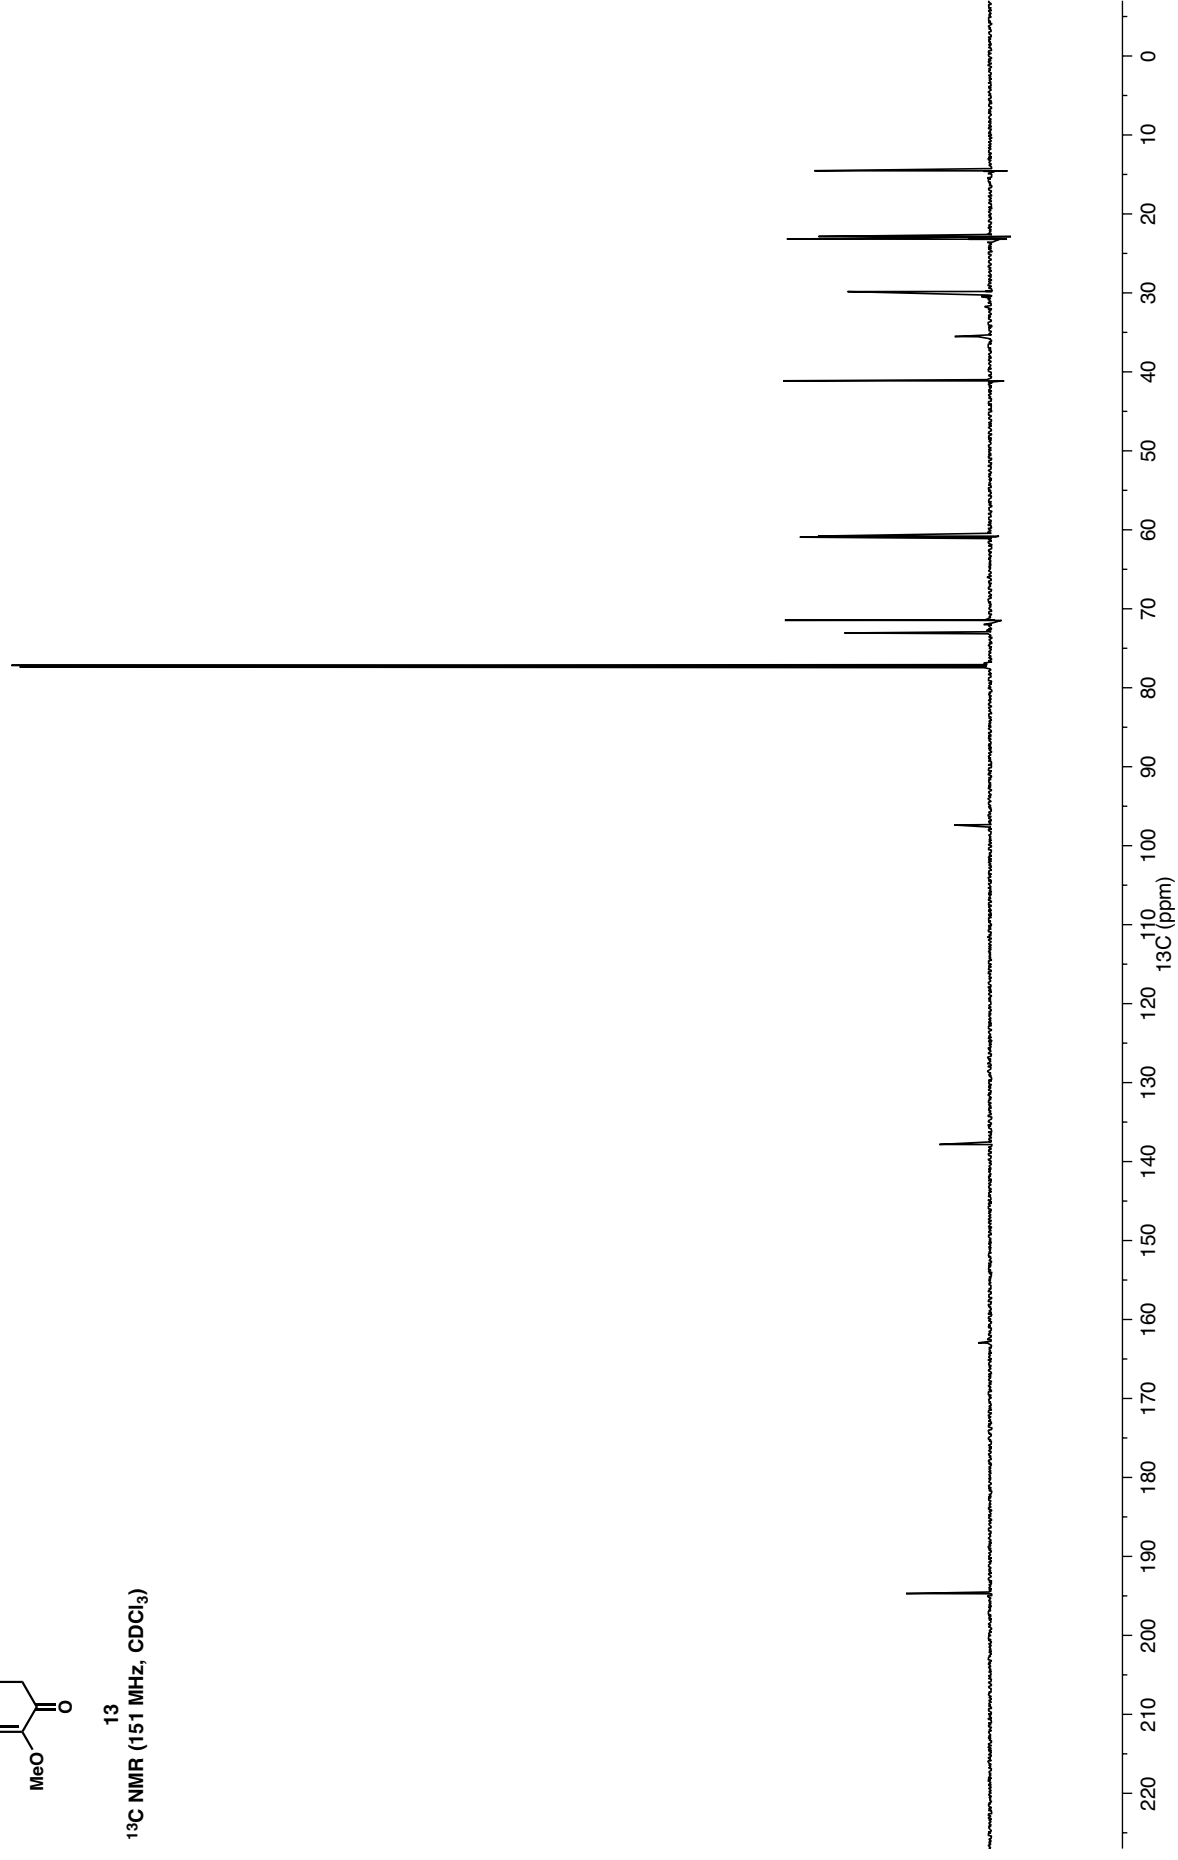

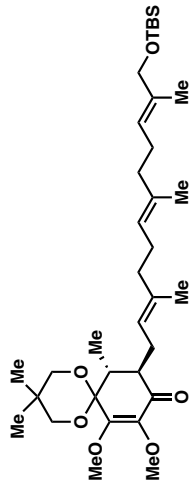

16  
<sup>1</sup>H NMR (400 MHz, CDCl<sub>3</sub>)

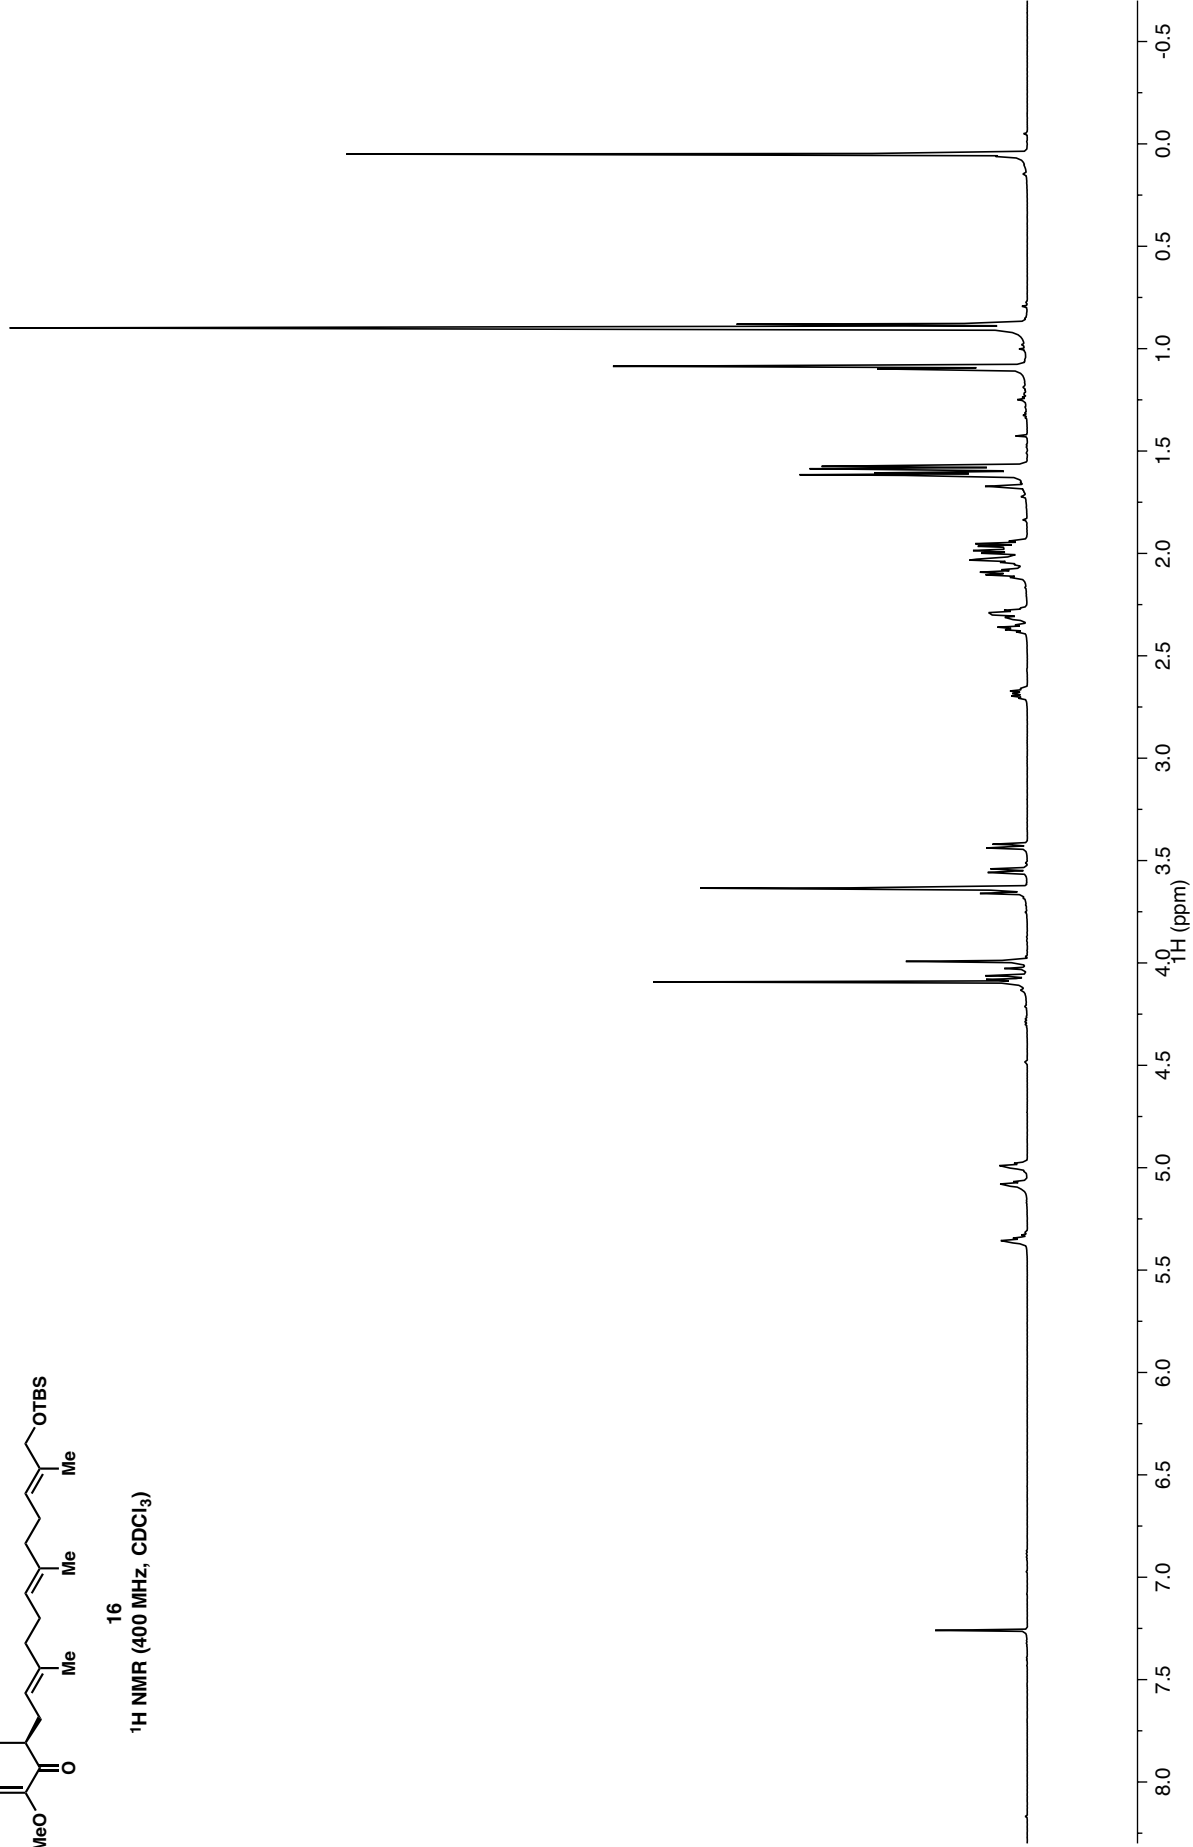

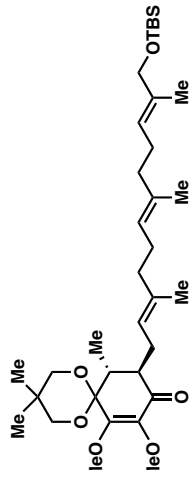

16  
<sup>13</sup>C NMR (151 MHz, CDCl<sub>3</sub>)

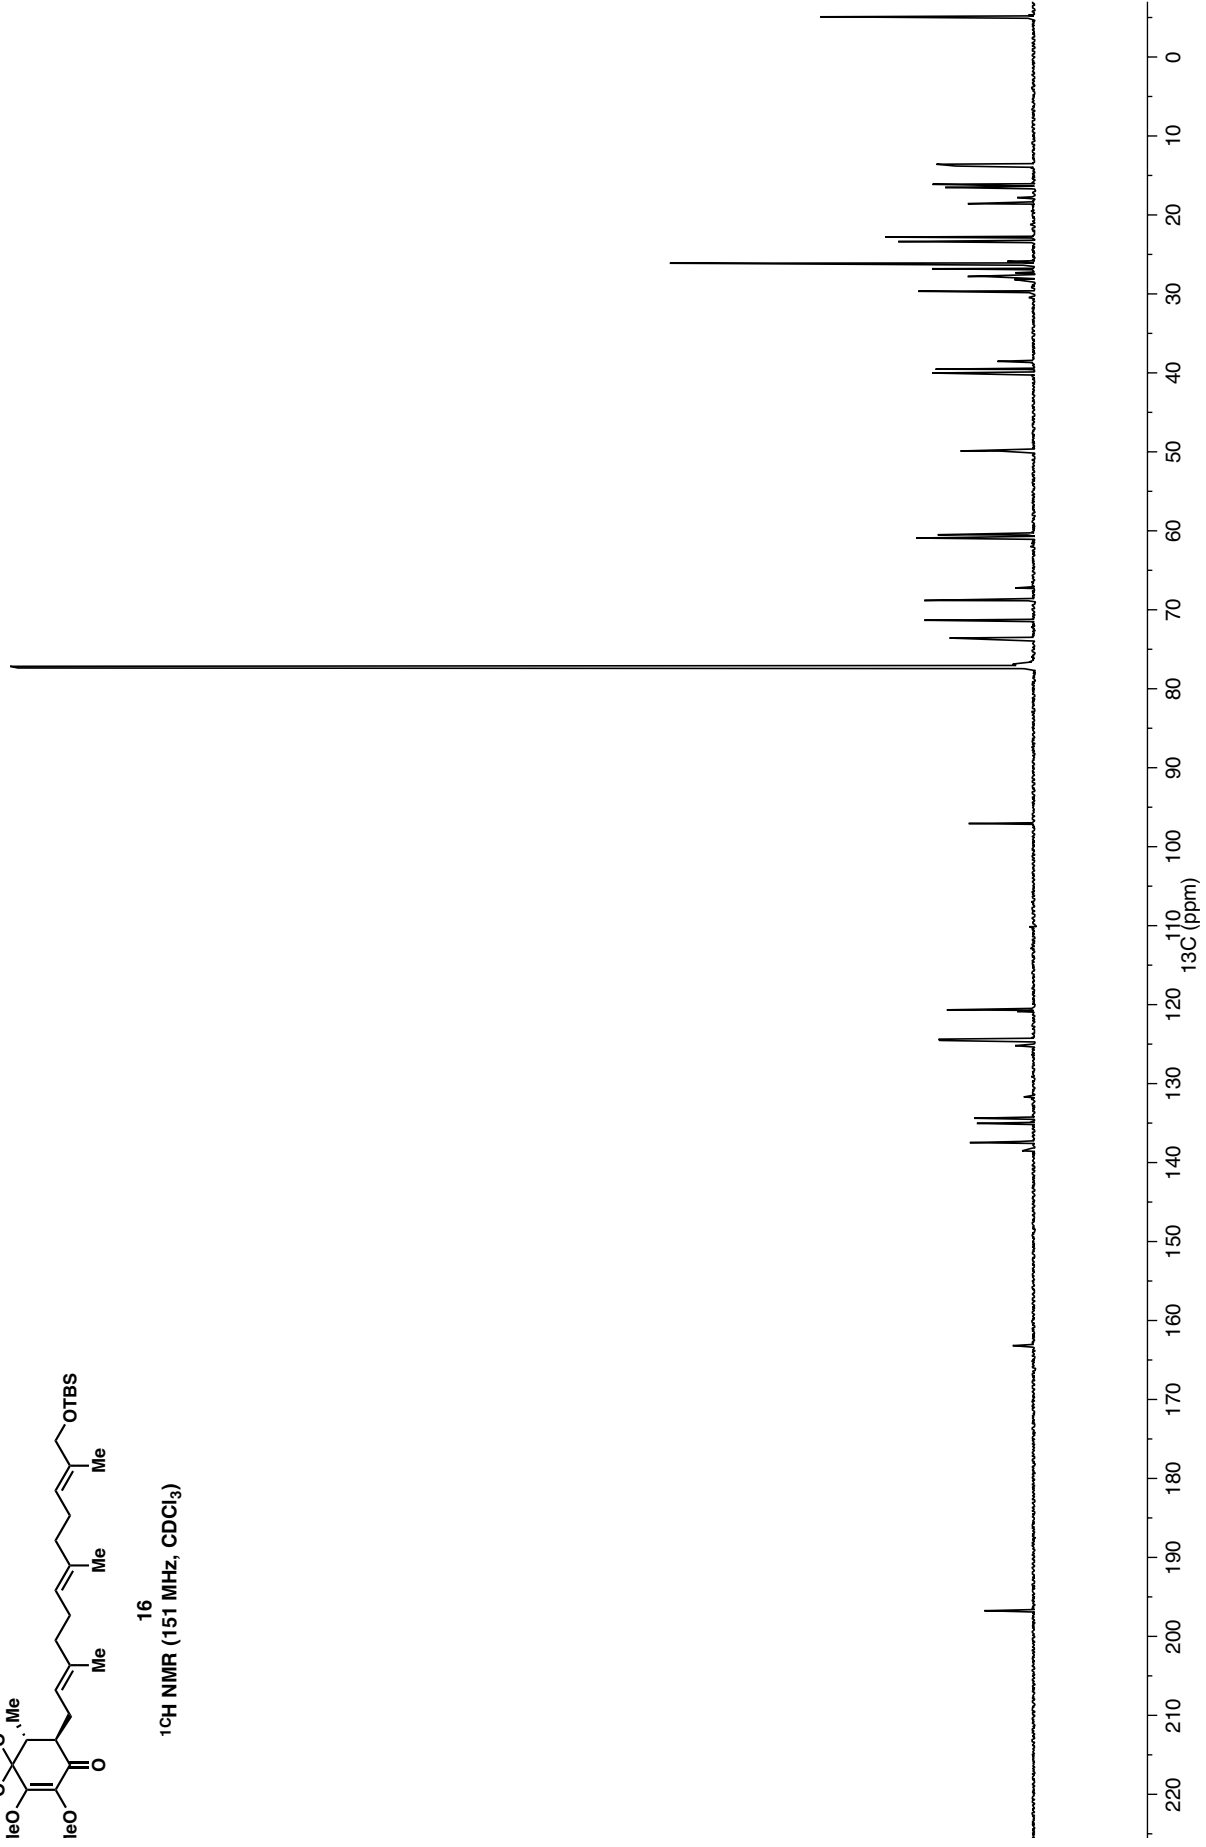

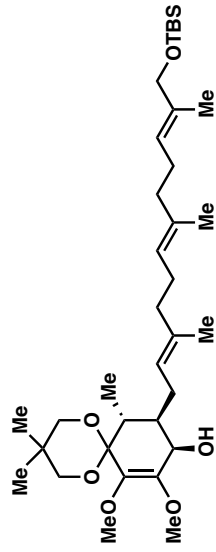

SI5  
<sup>1</sup>H NMR (400 MHz, CDCl<sub>3</sub>)

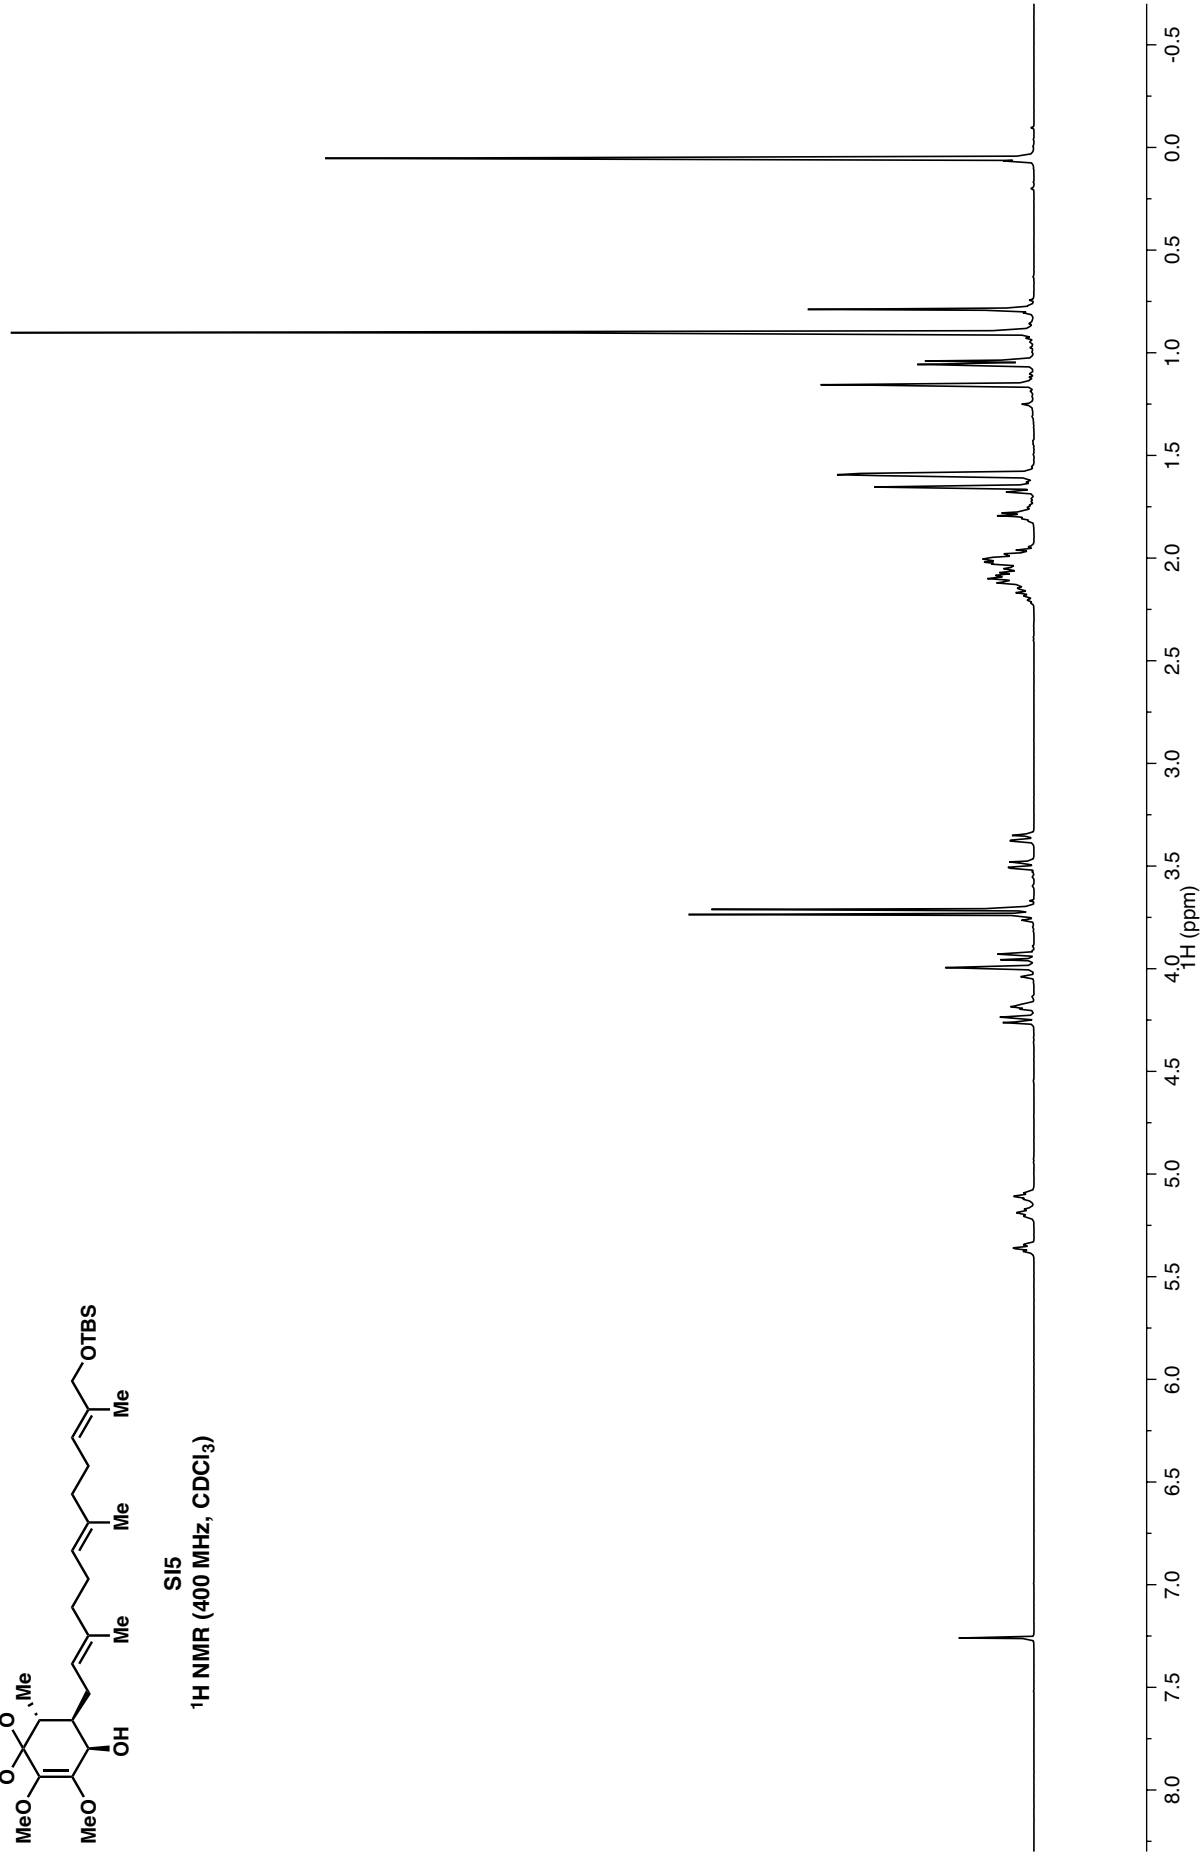

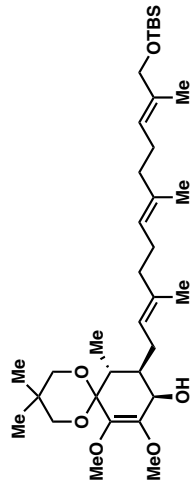

SI5

$^{13}\text{C}$  NMR (151 MHz,  $\text{CDCl}_3$ )

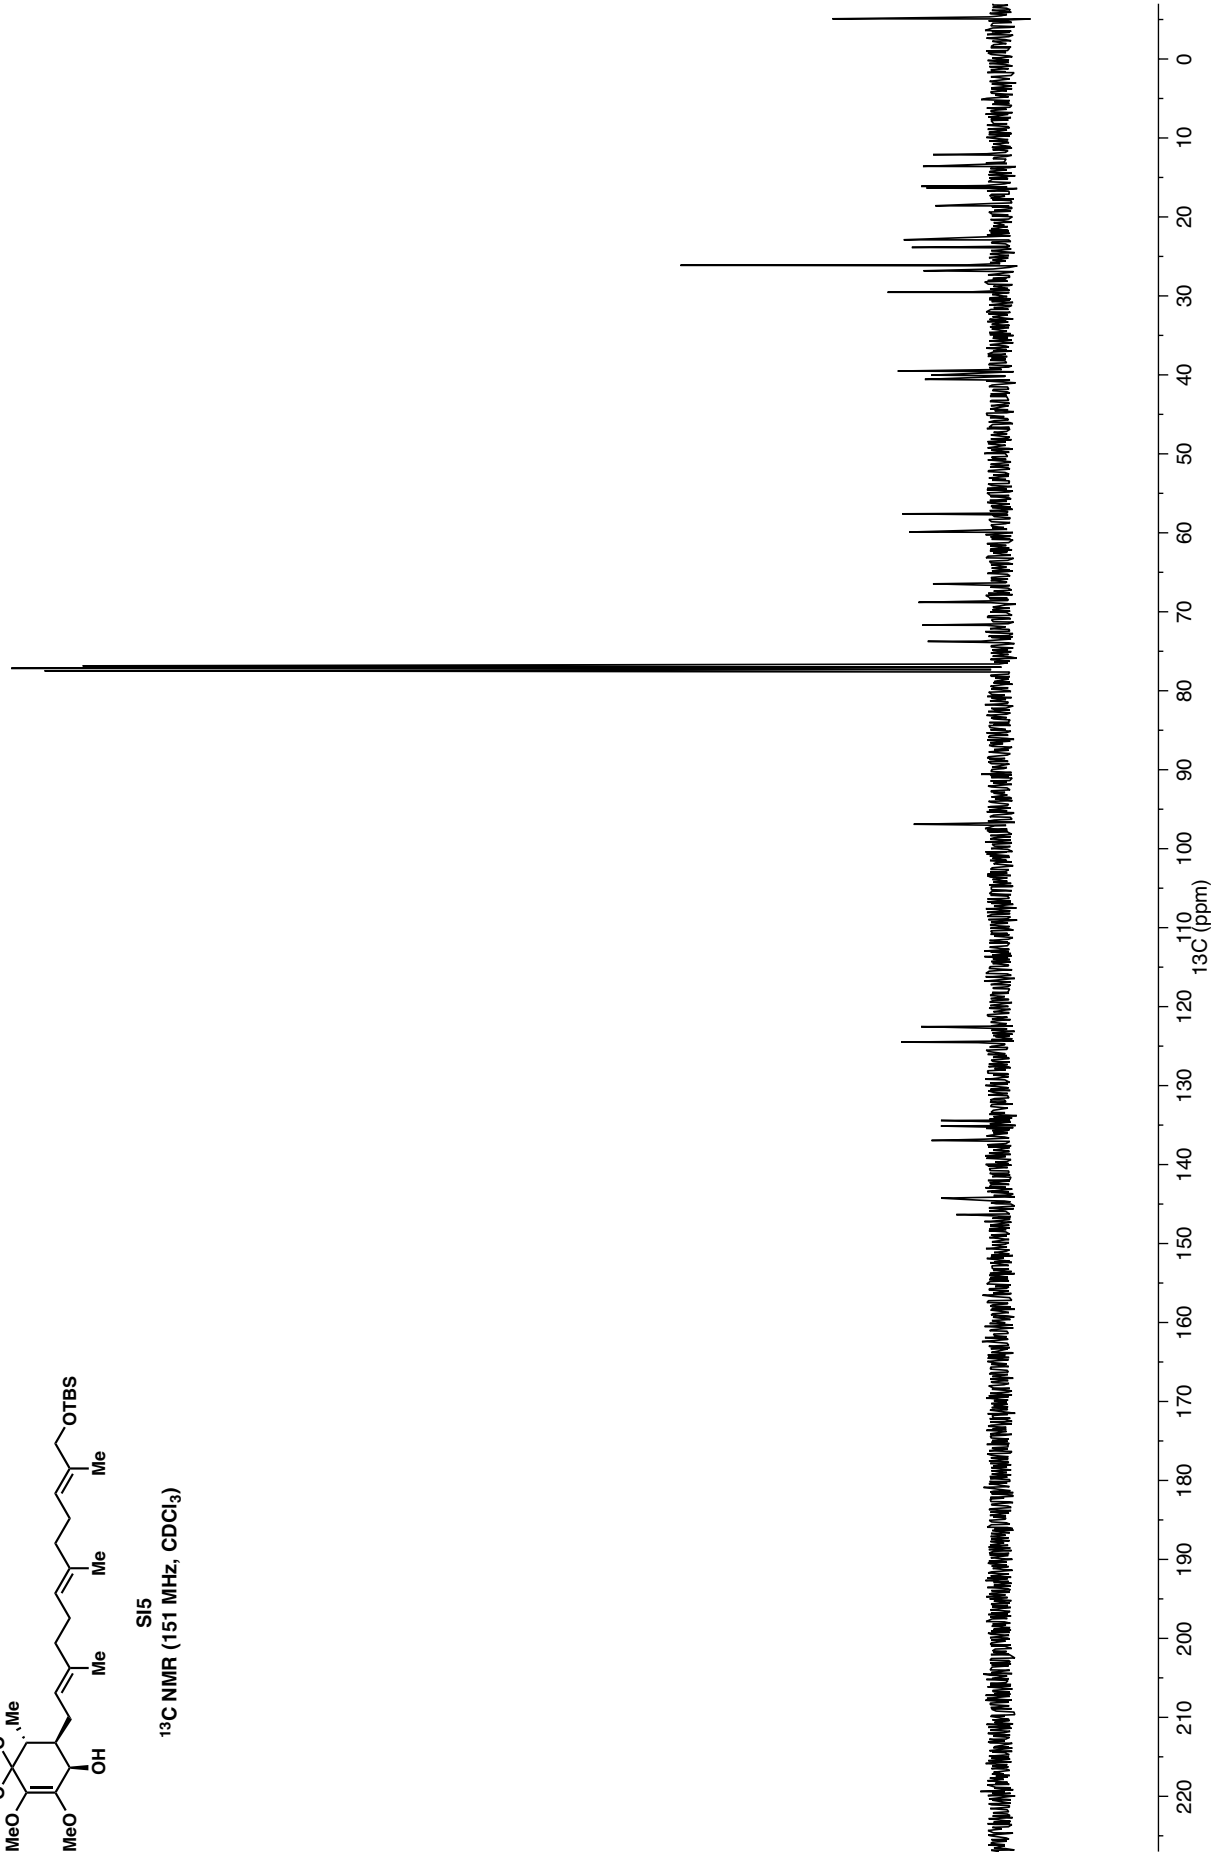

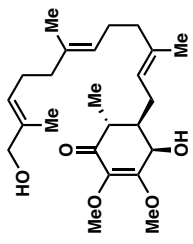

17

<sup>1</sup>H NMR (600 MHz, CDCl<sub>3</sub>)

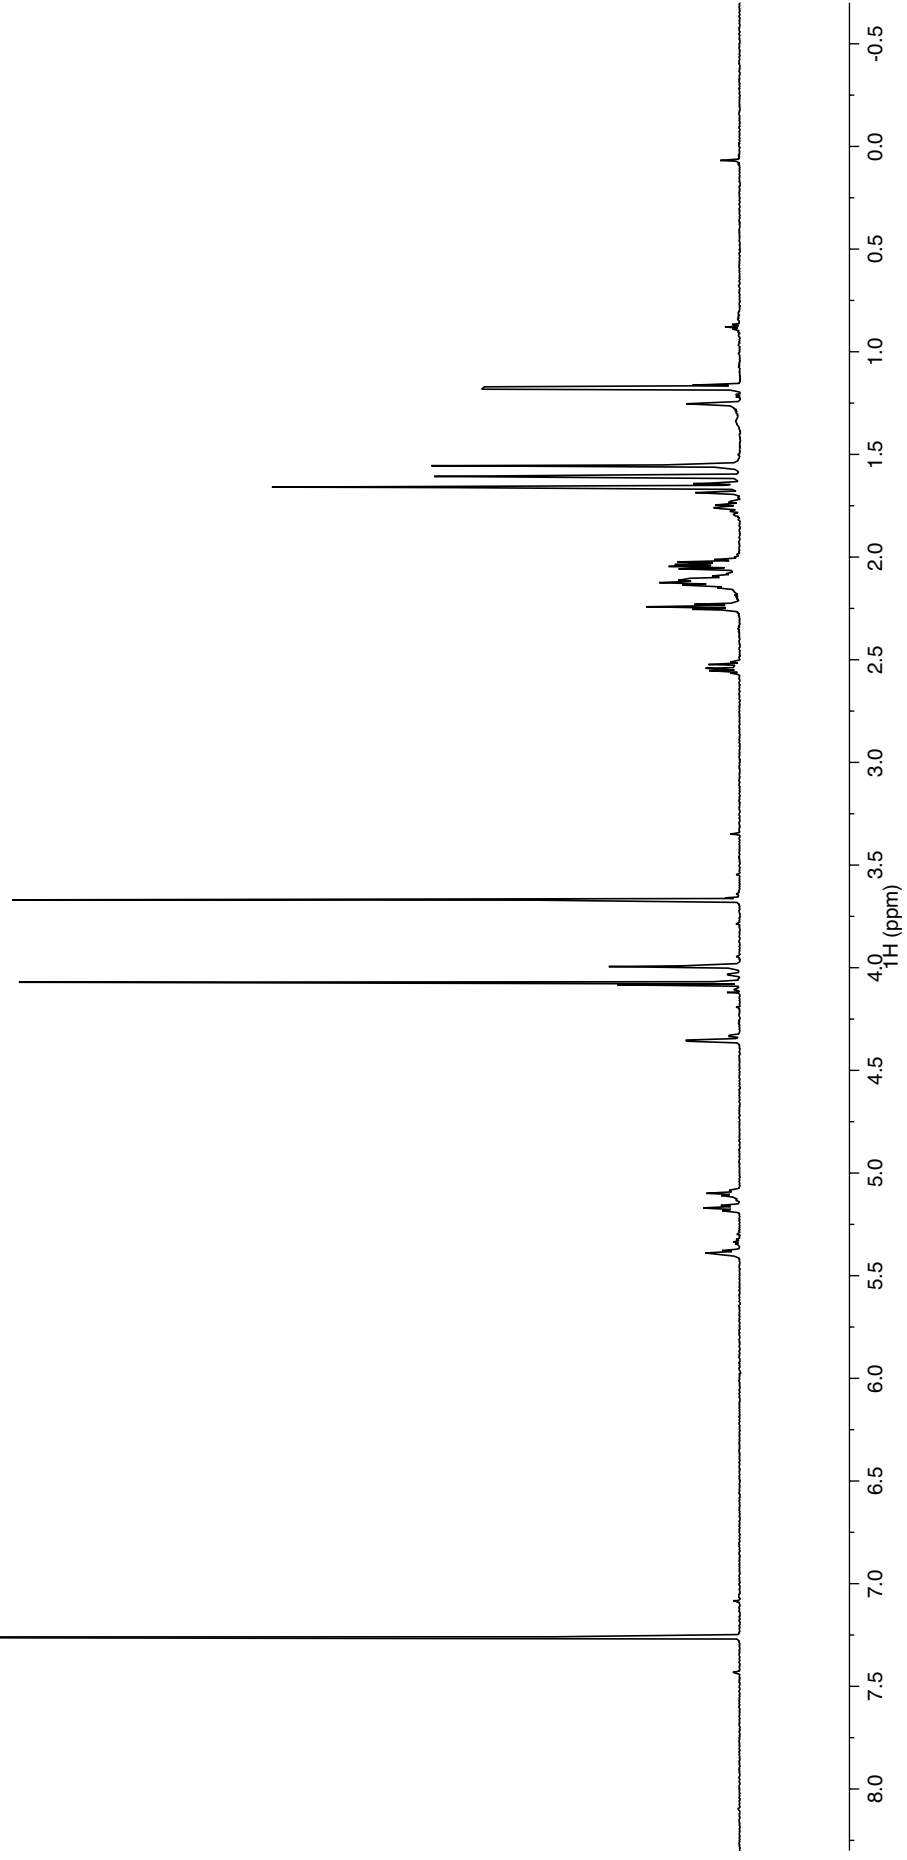



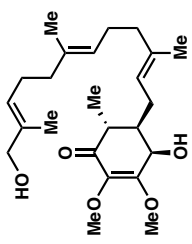

17  
<sup>13</sup>C NMR (151 MHz, CDCl<sub>3</sub>)

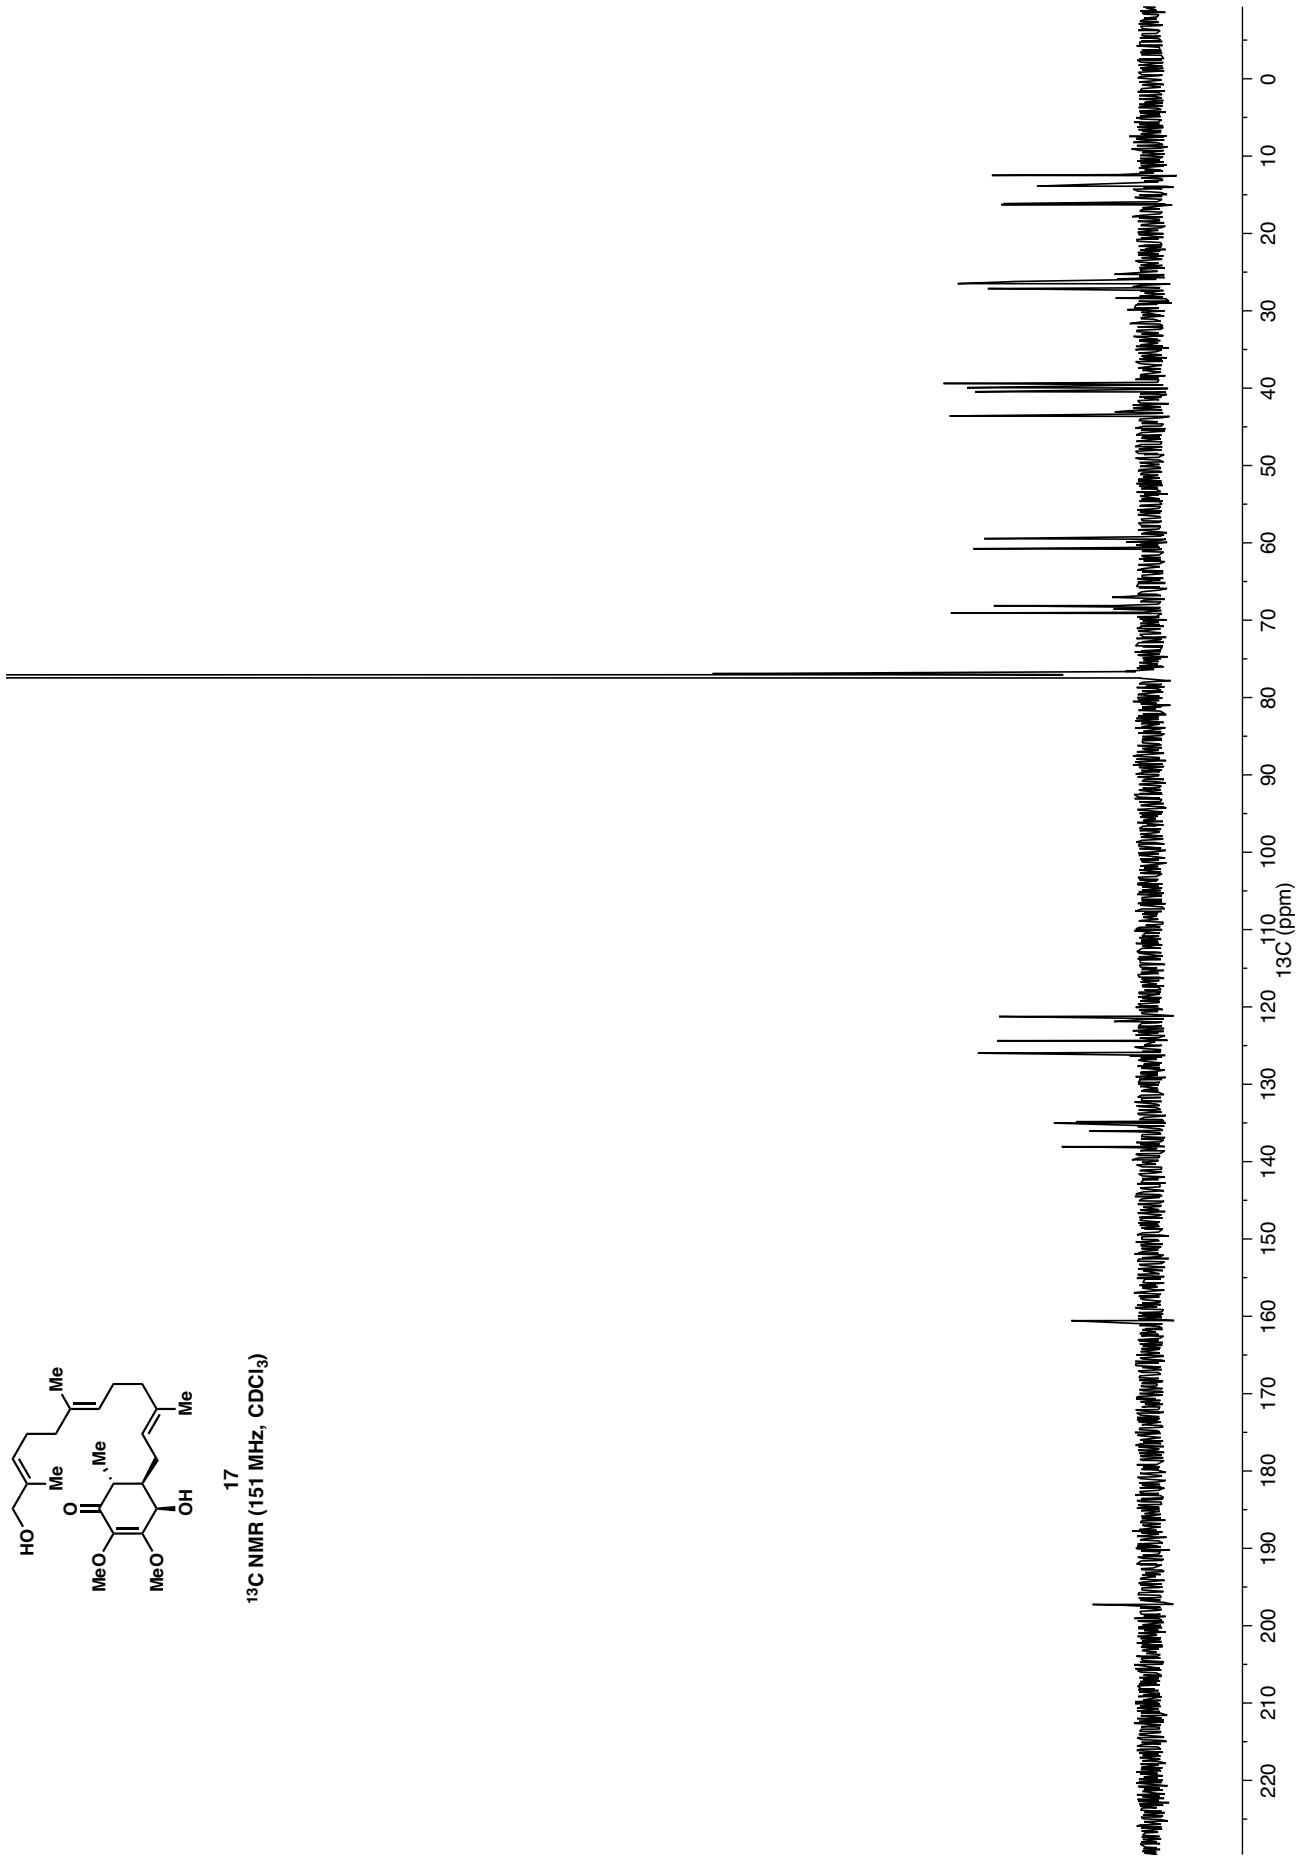

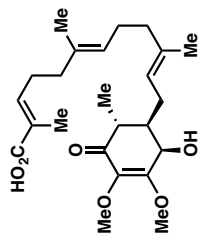

15  
<sup>1</sup>H NMR (400 MHz, CDCl<sub>3</sub>)

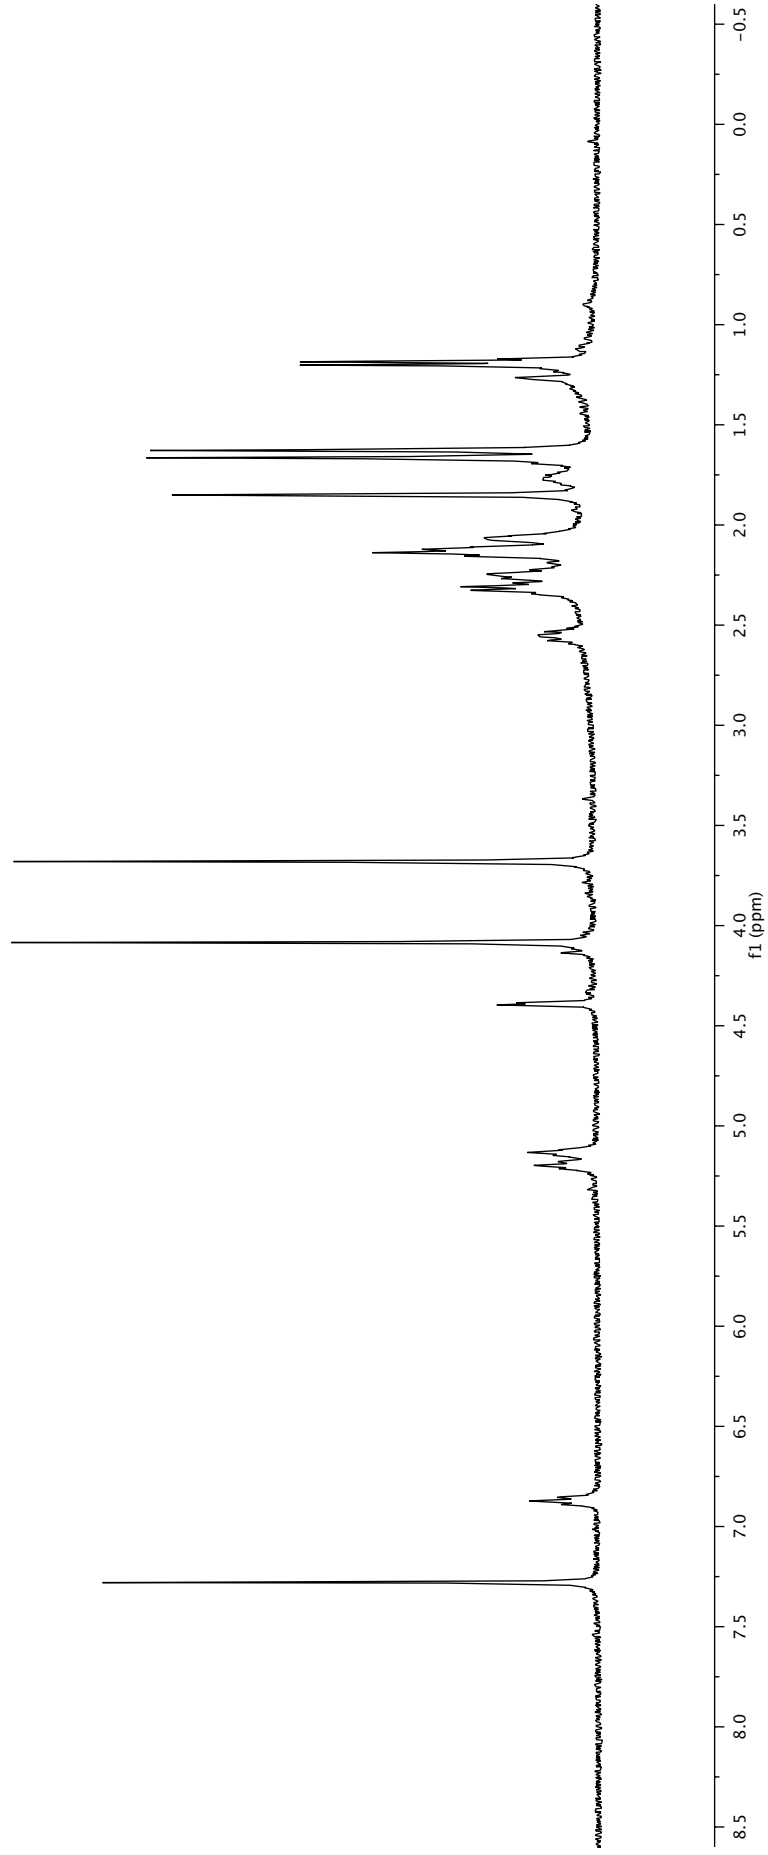

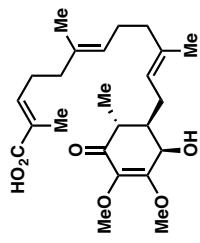

15  
<sup>13</sup>C NMR (151 MHz, CDCl<sub>3</sub>)

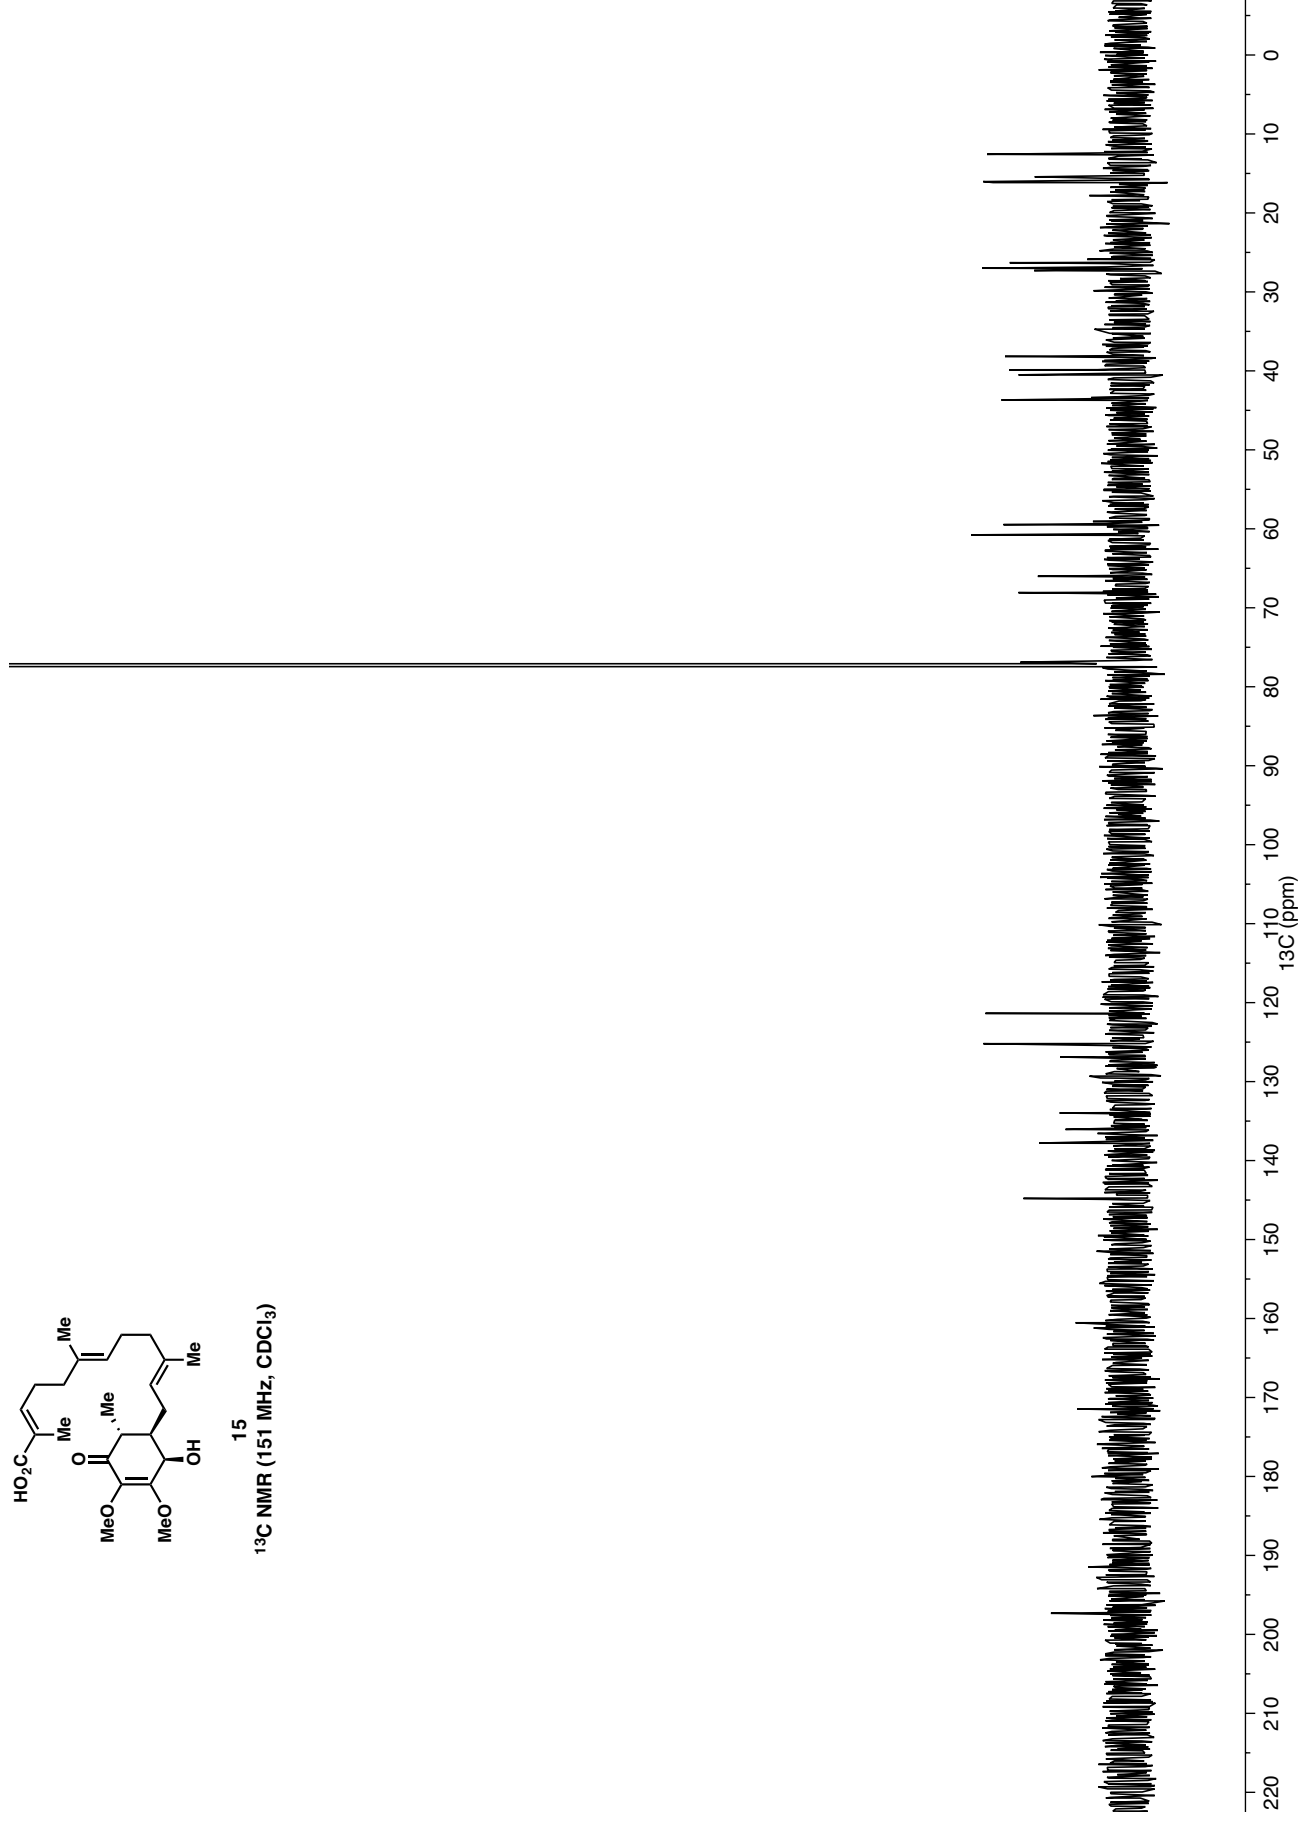

Supplement: oc5b00345_si_003.pdf [file oc5b00345_si_003.pdf]
